1        **Hamsters are a model for COVID-19 alveolar regeneration mechanisms: an**  
2        **opportunity to understand post-acute sequelae of SARS-CoV-2**

3  
4        Laura Heydemann<sup>1,§</sup>, Malgorzata Ciurkiewicz<sup>1,§</sup> Georg Beythien<sup>1</sup>, Kathrin Becker<sup>1</sup>,  
5        Klaus Schughart<sup>2,3</sup>, Stephanie Stanelle-Bertram<sup>4</sup>, Berfin Schaumburg<sup>4</sup>, Nancy  
6        Mounogou-Kouassi<sup>4</sup>, Sebastian Beck<sup>4</sup>, Martin Zickler<sup>4</sup>, Mark Kühnel<sup>5,6</sup>, Gülsah  
7        Gabriel<sup>4</sup>, Andreas Beineke<sup>1</sup>, Wolfgang Baumgärtner<sup>1,#</sup> and Federico Armando<sup>1,#</sup>

8  
9        <sup>1</sup> Department of Pathology, University of Veterinary Medicine, Foundation, Hannover, Germany

10        <sup>2</sup> Department of Microbiology, Immunology and Biochemistry, University of Tennessee  
11        Health Science Center, Memphis, Tennessee, USA,

12        <sup>3</sup> Institute of Virology Münster, University of Münster, Münster, Germany

13        <sup>4</sup> Department for Viral Zoonoses-One Health, Leibniz Institute for Virology, Hamburg,  
14        Germany;

15  
16        <sup>5</sup> Institute of Pathology, Hannover Medical School (MHH), Hannover, Germany

17        <sup>6</sup> Member of the German Center for Lung Research (DZL), Biomedical Research in  
18        Endstage and Obstructive Lung Disease Hannover (BREATH), Hannover Medical  
19        School (MHH), Hannover, Germany

20        § These authors contributed equally as co-first authors

21        # These authors contributed equally as co-last authors

22

23        **Correspondence** and requests for materials should be addressed to Wolfgang

24        Baumgärtner. [Wolfgang.baumgaertner@tiho-hannover.de](mailto:Wolfgang.baumgaertner@tiho-hannover.de)

25

26        **Abstract:**

27        A relevant number of coronavirus disease 2019 (COVID-19) survivors suffers from  
28        post-acute sequelae of severe acute respiratory syndrome coronavirus 2 (SARS-CoV-  
29        2) (PASC). Current evidence suggests a dysregulated alveolar regeneration in COVID-  
30        19 as a possible explanation for respiratory PASC symptoms, a phenomenon which  
31        deserves further investigation in a suitable animal model. This study investigates  
32        morphologic and transcriptomic features of alveolar regeneration in SARS-CoV-2  
33        infected Syrian golden hamsters. We demonstrate that CK8<sup>+</sup> alveolar differentiation  
34        intermediate (ADI) cells accumulate following SARS-CoV-2-induced diffuse alveolar  
35        damage. A subset of ADI cells shows nuclear accumulation of TP53 at 6- and 14-days  
36        post infection (dpi), indicating a prolonged arrest in the ADI state. Transcriptome data  
37        shows the expression of gene signatures driving ADI cell senescence, epithelial-

38 mesenchymal transition, and angiogenesis. Moreover, we show that multipotent CK14<sup>+</sup>  
39 airway basal cell progenitors migrate out of terminal bronchioles, aiding alveolar  
40 regeneration. At 14 dpi, persistence of ADI cells, peribronchiolar proliferates, M2-type  
41 macrophages, and sub-pleural fibrosis is observed, indicating incomplete alveolar  
42 restoration. The results demonstrate that the hamster model reliably phenocopies  
43 indicators of a dysregulated alveolar regeneration of COVID-19 patients. The study  
44 provides a suitable translational model for future research on the pathomechanisms of  
45 PASC and testing of prophylactic and therapeutical approaches.

46

47 **Keywords:**

48 post-acute sequelae of SARS-CoV-2 (PASC), alveolar regeneration, hamster, alveolar  
49 differentiation intermediate (ADI) cell, lung fibrosis

50

51 **Introduction**

52 Severe acute respiratory syndrome coronavirus 2 (SARS-CoV-2), caused over 600  
53 million infections and over 6.5 million fatal outcomes to this day (October 2022, WHO).  
54 Patients surviving acute COVID-19 are at risk to develop post-acute sequelae of SARS-  
55 CoV-2 (PASC) <sup>1-3</sup>. PASC occurs in 3-11.7% of infected individuals and is characterized  
56 by symptoms such as fatigue, headache, cognitive dysfunction, altered smell and taste,  
57 shortness of breath, and dyspnea, occurring >12 weeks after acute virus infection <sup>4,5</sup>. Of  
58 note, among patients with severe disease requiring hospitalization, shortness of breath  
59 or dyspnea are reported with a much higher frequency (in up to 49% and 23.3% of cases,  
60 respectively) 8-10 months after acute disease <sup>6,7</sup>. The pathomorphological correlates and  
61 mechanisms responsible for respiratory PASC are still not fully understood. Impairment  
62 of gas exchange capacity due to an incomplete or protracted regeneration of alveoli and  
63 lung fibrosis represent potential pathomechanisms <sup>8-10</sup>. SARS-CoV-2 infection of the lung  
64 causes diffuse alveolar damage (DAD), characterized by necrosis of alveolar epithelial  
65 type 1 and 2 (AT1 and AT2) cells, fibrin exudation and edema, followed by alveolar  
66 epithelial hyperplasia in later stages <sup>11,12</sup>. The healing of damaged alveoli and recovery  
67 of gas exchange capacity requires the presence of progenitor cells that are able to  
68 regenerate lost AT1 cells. For a long time, it was assumed that AT1 cells are regenerated  
69 solely by proliferating and trans-differentiating AT2 cells. However, recent advances in

70 mouse models of lung injury have shown that different airway progenitor cell types expand  
71 and mobilize to repair alveolar structures<sup>13-16</sup>. AT2 cells are mainly responsible for AT1  
72 cell regeneration in homeostatic turnover and following mild injury, while airway  
73 progenitors are recruited after severe injury with marked AT1 cell loss<sup>15,17</sup>. The  
74 differentiation into mature AT1 cells features an intermediate step, the so-called *alveolar*  
75 *differentiation intermediate* (ADI) cell, first described to occur during AT2 to AT1 cell trans-  
76 differentiation<sup>18-21</sup>. ADI cells in mice are characterized by cytokeratin 8 (CK8) expression,  
77 a polygonal to elongated morphology, NFκB and TP53 activation and upregulation of  
78 genes involved in epithelial–mesenchymal transition (EMT), HIF-1α pathway, and cell  
79 cycle exit<sup>8,19</sup>. ADI cells have been observed in various lung injury models, e.g. bleomycin  
80 injury, neonatal hypoxia and hyperoxia, LPS injury and Influenza A virus infection<sup>18-20</sup>. In  
81 homeostatic turnover and mild injury, these cells occur only transiently and differentiate  
82 into mature AT1 cells eventually, thereby restoring normal alveolar structure and function  
83<sup>19,21,22</sup>. However, a pathological persistence of ADI cells has been observed in idiopathic  
84 pulmonary fibrosis (IPF) in humans and a mouse model for progressive fibrosis,  
85 suggesting that a blockage during trans-differentiation of ADI to AT1 cells could represent  
86 a potential regenerative defect in these conditions<sup>8,18,19,21,23</sup>. Recently, high numbers of  
87 ADI cells have also been demonstrated in lungs of COVID-19 patients. It has been  
88 postulated that a prolonged persistence of these cells could be responsible for unremitting  
89 hypoxemia, edema, ventilator dependence and the fatal outcome in protracted ARDS as  
90 well as the subsequent development of fibrosis in PASC<sup>8,9,24,25</sup>. Since it is impossible to  
91 obtain serial samples in human observational studies, the fate of COVID-19 associated  
92 ADI cells remains elusive. Addressing this open question is of paramount importance to  
93 obtain a deeper understanding of the factors that contribute to the protracted recovery  
94 from COVID-19 facilitating the development of rational therapeutic approaches in the field  
95 of lung regenerative medicine. The development of a precise working hypothesis and  
96 subsequent preclinical testing of therapeutic options requires the study of sequential  
97 phases of SARS-CoV-2 infection in appropriate animal models. Among the susceptible  
98 small animal species, Syrian golden hamsters (*Mesocricetus auratus*) are best suited to  
99 study regenerative responses. They develop a distinct, but transient and non-lethal  
100 disease, in contrast to other models such as transgenic mice or ferrets<sup>26-30</sup>. Recovering  
101 hamsters show a pronounced epithelial cell proliferation within airways and alveoli<sup>31</sup>.  
102 Importantly, alveolar epithelial proliferates persist until 4-5 weeks after infection, long after  
103 the virus is cleared from the respiratory tract, which takes place at around 7 dpi<sup>32</sup>. These

104 epithelial proliferates have not been characterized in detail in this important animal model  
105 of SARS-CoV-2 infection yet. It is hypothesized that delayed regeneration due to ADI cell  
106 persistence after SARS-CoV-2 infection represents a crucial pathogenetic mechanism for  
107 the development of PASC symptoms. Therefore, we conducted a characterization of  
108 proliferating epithelial cells in SARS-CoV-2 infected hamsters. Our study shows that i)  
109 CK8<sup>+</sup>ADI cells are a feature of alveolar regeneration, ii) multipotent CK14<sup>+</sup> airway basal  
110 cells participate in alveolar regeneration and iii) persistence of ADI cells is associated with  
111 incomplete alveolar restoration and fibrosis in SARS-CoV-2 infected hamsters.  
112 Furthermore, the results provide the basis for future research on the pathomechanisms of  
113 PASC and provide a translational model for testing prophylactic and therapeutical  
114 approaches for this syndrome.

## 115 **Results**

### 116 **1. SARS-CoV-2 induced epithelial proliferative responses and inflammation** 117 **persist beyond virus clearance**

118 First, we confirmed successful infection by immunohistochemistry for SARS-CoV-2  
119 nucleoprotein (NP) antigen in lung tissue. Viral antigen was found in alveolar and  
120 bronchial epithelia as well as in macrophages (**Fig. 1A**), as described previously <sup>33</sup>.  
121 Quantification of immunolabeled cells in whole lung sections peaked at 3 dpi, followed  
122 by a sharp decline at 6 dpi and virus clearance at 14 dpi (**Fig. 1A**). No SARS-CoV-2<sup>+</sup>  
123 cells were detected in mock-infected animals at any time point. Histologically, SARS-  
124 CoV-2 infected animals showed a marked, transient, broncho-interstitial pneumonia,  
125 as described previously <sup>31,33-35</sup>. The lesions were characterized by DAD with epithelial  
126 cell degeneration and necrosis, sloughing of alveolar cells, fibrin exudation and  
127 heterophilic and histiocytic infiltrates. Some mock-infected animals showed small foci  
128 of mild, multifocal, interstitial inflammation composed of heterophils and macrophages,  
129 particularly at 1 dpi. The extent of inflammation in SARS-CoV-2 and mock infected  
130 animals was quantified in total lung sections using whole slide digital image analysis  
131 of Iba-1 immunolabeling. The number of Iba-1<sup>+</sup> cells was significantly higher in SARS-  
132 CoV-2 infected animals compared to the mock group at 1, 3, and 6, with a notable peak  
133 at 6 dpi (**Fig. 1B**).

134 The inflammatory lesions in SARS-CoV-2 infected hamsters were accompanied by a  
135 prominent epithelial proliferation (**Fig. 1C**). At 3 dpi, small foci of hyperplastic epithelial  
136 cells were observed within alveoli in single animals, affecting up to 1.3% of the

137 examined lung area (**Fig. 1C**). These cells were characterized by variable  
138 morphologies, including a round cell shape typical of AT2 cells and a more polygonal  
139 to sometimes elongated shape resembling ADI cells. Cells also occasionally displayed  
140 hypertrophic features like enlarged, irregular, euchromatic nuclei with distinct nucleoli  
141 (**Fig. 1C**). Hypertrophic epithelial cells were also present at bronchiolar-alveolar  
142 junctions, and they appeared to spread out of the terminal bronchioles towards  
143 adjacent alveoli. At 6 dpi, large areas of prominent epithelial cell proliferation were  
144 found, affecting 9.3% to 39.3% of the examined lung area (**Fig. 1C**). In the alveoli,  
145 strings of round, plump polygonal or elongated cells lining alveolar septa were found  
146 (AT2 and ADI cells) (**Fig. 1C**). Surrounding terminal bronchioles, a proliferation of  
147 cuboidal airway epithelial cells forming pods, ribbons and tubules was observed. In the  
148 periphery, these peri-bronchiolar proliferates merged with areas of alveolar epithelial  
149 hyperplasia, showing a transition from a cuboidal to a polygonal, ADI-like shape (**Fig.**  
150 **1C**). Many cells within both types of proliferates showed atypical features such as cyto-  
151 and karyomegaly, bizarrely shaped and euchromatic nuclei, as well as abundant, partly  
152 atypical, mitotic figures (**Fig. 1C**). At 14 dpi, multifocal areas of epithelial proliferates  
153 were still observed, affecting 2.1% to 7.2% of the examined lung area, often around  
154 terminal airways (**Fig. 1C**). In addition, a majority of animals (7 out of 9) showed foci of  
155 sub-pleural fibrosis.

156 In summary, SARS-CoV-2-infected hamsters showed a prominent and heterogeneous  
157 epithelial proliferative response that persisted beyond virus clearance. Based on our  
158 morphological observations and what has been described in mouse models for lung  
159 injury <sup>15,19,21</sup> and in COVID-19 patients <sup>8,9</sup>, we hypothesized that in the Syrian golden  
160 hamsters 1) alveolar AT2 cells proliferate, mobilize and differentiate into AT1 cells  
161 through the ADI cell state, 2) airway-derived progenitors participate in alveolar  
162 regeneration, possibly through a transitional AT2 or ADI cell state and 3) the  
163 regeneration process is partly incomplete, leading to residual lesions. To further  
164 substantiate this interpretation, we aimed to characterize the trans-differentiation  
165 process of AT2 and airway progenitors in more detail.

## 166 **2. CK8<sup>+</sup> ADI cells frequently express TP53 and persist until 14 dpi following** 167 **SARS-CoV-2 induced DAD in hamsters**

168 ADI cells are reported to originate from AT2 and/or a particular subset of club cells  
169 expressing MHC-II <sup>19</sup>. The AT2 to ADI cell trans-differentiation process is characterized

170 by gradual down-regulation of AT2 cell markers, expression of CK8 and cell cycle exit  
171 markers, as well as a morphologic transition from a round to a polygonal to elongated  
172 shape<sup>19,20</sup>. In the following, we focused on the first part of this AT2-ADI-AT1 trajectory  
173 (**Fig. 2A**).

174 First, we detected proSP-C<sup>+</sup> AT2 and CK8<sup>+</sup> ADI cells using immunohistochemistry.  
175 Quantification was performed within total alveoli first, followed by a separate analysis  
176 in areas showing inflammation and/or epithelial proliferation (termed “affected alveoli”)  
177 and histologically unremarkable alveoli (termed “non-affected alveoli”). proSP-C  
178 expression was detected in cells with a round shape lining alveolar septa. In mock-  
179 infected animals, the number of proSP-C<sup>+</sup> cells was constant at all investigated time-  
180 points (**Fig. 2B**). In SARS-CoV-2 infected animals, the total number of proSP-C<sup>+</sup> cells  
181 increased significantly at 6 dpi, which was caused by an increase within affected  
182 alveoli. proSP-C<sup>+</sup> cells were found in small groups within inflammatory foci (**Fig. 2B**).  
183 Scattered proSP-C<sup>+</sup> cells were observed in close proximity of terminal bronchioles.  
184 Interestingly, the majority of cells within the epithelial proliferates at 6 dpi were proSP-  
185 C<sup>-</sup>.

186 CK8 was ubiquitously expressed in the apical cytoplasm of luminal cells within bronchi,  
187 bronchioles and terminal bronchioles in all animals. In the alveoli of mock-infected  
188 animals, rare elongated CK8<sup>+</sup> cells were observed, making up less than 1% of total  
189 alveolar cells. In SARS-CoV-2 infected animals however, CK8 was abundantly  
190 expressed within the epithelial proliferative foci at 3, 6 and 14 dpi and the number of  
191 CK8<sup>+</sup> cells in total alveoli was significantly increased compared to the mock group (**Fig.**  
192 **2C**). Importantly, increased numbers of CK8<sup>+</sup> cells were detected within affected and  
193 non-affected alveoli. Within affected alveoli, the relative numbers of CK8<sup>+</sup> cells  
194 remained constantly elevated throughout the investigation period. CK8<sup>+</sup> cells displayed  
195 a variable cell morphology including round, polygonal, as well as elongated shapes  
196 with thin cytoplasmic processes (**Fig. 2C**).

197 Double-labeling for proSP-C and CK8 demonstrated AT2 to ADI cell transition. At 3  
198 dpi, numerous proSP-C<sup>+</sup>CK8<sup>-</sup> cells and rare proSP-C<sup>+</sup>CK8<sup>+</sup> cells with a round AT2 cell  
199 morphology were observed within affected alveoli (Supplem. Fig. 1A), whereas proSP-  
200 C<sup>-</sup>CK8<sup>+</sup> elongated cells were very rare. At 6 dpi, affected alveoli contained occasional  
201 proSP-C<sup>+</sup>CK8<sup>-</sup> and proSP-C<sup>+</sup>CK8<sup>+</sup> round cells (**Fig. 2D**). These cells were intermingled  
202 with high numbers of proSP-C<sup>-</sup>CK8<sup>+</sup> cells, which showed various morphologies ranging

203 from round AT2-type to polygonal ADI-type cells as well as bizarre, irregularly shaped  
204 cells with karyomegaly. Moreover, elongated proSPC-CK8<sup>+</sup> cells with AT1-type  
205 morphology were occasionally observed (Supplem. Fig. 1B). At 14 dpi, numerous  
206 proSPC<sup>+</sup>CK8<sup>+</sup> cells with AT2 morphology as well as occasional proSPC-CK8<sup>+</sup>  
207 polygonal cells were still detected in alveoli, including morphologically non-affected  
208 alveoli (Supplem. Fig. 1C).

209 Once AT2 cells enter the ADI state, they exit the cell cycle to allow AT1 trans-  
210 differentiation<sup>8,21</sup>. At 6 and 14 dpi, CK8<sup>+</sup> cells in SARS-CoV-2 infected animals  
211 expressed nuclear TP53, indicative of cell cycle arrest and DNA repair (**Fig. 2E**)  
212 (Supplem. Fig. 2A-B). TP53 expression was particularly frequent in polygonal, large,  
213 bizarre, occasionally bi-nucleated cells (Supplem. Fig. 2A-B). Of note, no TP53  
214 expression was observed in the rare CK8<sup>+</sup> cells in the alveoli of mock-infected animals.  
215 Our findings demonstrated that the transition between AT2 and ADI cells in SARS-  
216 CoV-2 infected hamsters features: i) transient co-expression of proSP-C and CK8, ii)  
217 changes in cell morphology from round to elongated as well as iii) expression of cell  
218 cycle arrest markers.

219 In functional regeneration, ADI cells transdifferentiate into mature AT1, which assume  
220 an elongated morphology with thin cytoplasmic processes required for adequate gas  
221 exchange. In the following, we focused on the last part of this AT2-ADI-AT1 trajectory.  
222 Double-labeling with AT1 cell markers described for human and mouse (AGER, AQP5,  
223 PDPN) was not possible since the tested antibodies failed to specifically label AT1 cells  
224 in the hamster (*data not shown*). For this reason, we performed transmission electron  
225 microscopy to demonstrate ADI to AT1 cell transition. In mock infected hamsters,  
226 alveolar septa were lined by AT1 cells, characterized by a flattened morphology with  
227 slender processes containing a moderately electron-dense, organelle-poor cytoplasm  
228 and a round to oval nucleus with a moderate amount of peripheral heterochromatin. In  
229 addition, round cells with an apico-basal polarity and a moderately electron-dense  
230 cytoplasm rich in rough endoplasmic reticulum and free ribosomes were found. These  
231 cells displayed features of AT2 cells, such as apical microvilli as well as variable  
232 numbers of membrane-bound vesicles containing multiple concentric membrane  
233 layers (multi-lamellar bodies). In SARS-CoV-2 infected animals, proliferative foci at 6  
234 dpi contained numerous AT2 cells (Supplem. Fig. 3A) as well as numerous  
235 hypertrophic epithelial cells with a variable cell morphology resembling ADI cells

236 (Supplem. Fig. 3B; Supplem. Fig. 4 A-B). Most importantly, cells sharing AT1 and AT2  
237 cell features were observed in the alveolar lining at the edges of proliferative foci. The  
238 cells showed the flattened and elongated morphology of AT1 cells, but also  
239 characteristics of AT2 cells, such as microvilli on the cell surface (**Fig. 2F**; Supplem.  
240 Fig. 3C-D). Similar ultrastructural findings were present in COVID-19 patients <sup>36</sup>. The  
241 present findings demonstrate that the last part of the AT2-ADI-AT1 trajectory also  
242 occurs in SARS-CoV-2 infected hamsters.

243 Finally, we sought to confirm that the ADI cells detected in the hamster share features  
244 with ADI cells in COVID-19 patients. For this, we used lung samples obtained from  
245 three patients with lethal COVID-19 ARDS. In addition, a fourth lung sample obtained  
246 from a lobectomy of a non-COVID case was used. Histologically, the lungs from all  
247 lethal COVID-19 ARDS cases showed features of moderate to severe, acute DAD,  
248 characterized by necrosis and sloughing of alveolar cells, fibrin exudation, hyaline  
249 membranes, alveolar edema and mild to moderate neutrophilic infiltrates (**Fig. 3A**). In  
250 the non-COVID-19 sample, a suppurative bronchopneumonia was diagnosed,  
251 characterized by neutrophilic and histiocytic infiltrates in bronchioles and alveolar  
252 lumina (**Fig. 3A**). Immunolabeling showed the presence of round proSP-C<sup>+</sup>CK8<sup>+</sup> cells  
253 and polygonal to elongated proSP-C<sup>+</sup>CK8<sup>+</sup> cells, representing the different stages of  
254 ADI cells, in all COVID-19 ARDS samples as well as the non-COVID-19  
255 bronchopneumonia sample (**Fig. 3B**). Interestingly, CK8<sup>+</sup> ADI cells expressing TP53  
256 were only detected in the three COVID-19 ARDS samples, while no TP53 co-expression  
257 was detected in the ADI cells of the non-COVID-19 case (**Fig. 3C**).

258 In conclusion, ADI cells are a feature of attempted alveolar regeneration following  
259 SARS-CoV-2 induced DAD in COVID-19 and its Syrian golden hamster model. These  
260 cells were also detected in low numbers under non-infectious conditions in the hamster  
261 and in a human sample with suppurative bronchopneumonia, confirming that ADI cells  
262 participate in physiological turnover and alveolar repair regardless of the etiology in  
263 both species. Importantly, only ADI cells from SARS-CoV-2 infected hamsters and  
264 humans expressed TP53, hinting at a prolonged block of these cells in the intermediate  
265 state.

266 **3. Multipotent airway-derived CK14<sup>+</sup> progenitors contribute to alveolar**  
267 **regeneration following SARS-CoV-2 induced DAD in hamsters**



268 It is well accepted that upon severe alveolar injury, both AT1 and AT2 cells can be  
269 replenished by airway progenitors (**Fig. 4 A**)<sup>15,17,37-39</sup>. In the next step, we wanted to  
270 demonstrate the contribution of airway progenitors to alveolar regeneration in SARS-  
271 CoV-2 infected hamsters. As described earlier, histopathological lesions at 6 and 14  
272 dpi included foci of prominent alveolar epithelial proliferation with airway-like  
273 morphology that were frequently in anatomic continuity with bronchiolar-alveolar  
274 junctions. Thus, we determined 1) the cellular origin of these proliferates and 2)  
275 whether these progenitors differentiate into AT2 or ADI cells after migrating into the  
276 alveoli.

277 Multiple airway progenitor cell types have been reported to contribute to alveolar  
278 regeneration, including proSP-C+SCGB1A1<sup>+</sup> broncho-alveolar stem cells (BASCs),  
279  $\Delta$ NP63<sup>+</sup>CK5<sup>+</sup> distal alveolar stem cells (DASCs),  $\Delta$ NP63<sup>+</sup>CK5<sup>+</sup>CK14<sup>+</sup> basal cells, and  
280 SCGB1A1<sup>+</sup> club cells<sup>39-41</sup>. First, our aim was to identify these cell types in the airways  
281 of hamsters. The predominant basal cell types in the distal airways were CK14<sup>+</sup> cells  
282 and, to a lesser extent,  $\Delta$ NP63<sup>+</sup>CK14<sup>+</sup> cells.  $\Delta$ NP63<sup>+</sup>CK5<sup>+</sup>CK14<sup>+</sup> cells,  $\Delta$ NP63<sup>+</sup>CK5<sup>+</sup>  
283 DASCs and CK5<sup>+</sup> cells were rare in the distal airways (Supplem. Fig. 5). BASCs are  
284 reported to be a very rare cell population and we did not detect SPC+SCGB1A1<sup>+</sup> cells  
285 in the distal airways our hamsters (*data not shown*). In addition to basal cell types,  
286 SCGB1A1<sup>+</sup> club cells were detected in high numbers in distal airways. In the peri-  
287 bronchiolar proliferates of SARS-CoV-2 infected animals at 6 dpi, the majority of cells  
288 were CK14<sup>+</sup>, while CK14<sup>+</sup> $\Delta$ NP63<sup>+</sup> cells were rare (Supplem. Fig. 6). CK5<sup>+</sup>,  
289 CK5<sup>+</sup> $\Delta$ NP63<sup>+</sup> or CK14<sup>+</sup>CK5<sup>+</sup> cells were not detected within the proliferates (Supplem.  
290 Fig. 6). SCGB1A1 expression was absent in the peri-bronchiolar proliferates at 6 dpi,  
291 but abundantly present at 14 dpi. Therefore, we focused our further quantitative  
292 analysis on CK14<sup>+</sup> airway basal cells and SCGB1A1<sup>+</sup>club cells.

293 In mock-infected hamsters, the number of CK14<sup>+</sup> cells in the airways remained  
294 unchanged over the observation period (**Fig. 4 B**). SARS-CoV-2 infection caused a  
295 marked proliferation of CK14<sup>+</sup> cells in the airways, which peaked at 6 dpi and remained  
296 elevated until 14 dpi. The number of CK14<sup>+</sup> cells in total alveoli was significantly  
297 increased compared to the mock group at 3, 6 and 14 dpi, mirroring the increase in the  
298 airways (**Fig. 4 B**). CK14 was expressed by the majority of cells in the peri-bronchiolar  
299 proliferations forming pods and tubules continuous with terminal bronchioles at 6 dpi.  
300 At 14 dpi, the peri-bronchiolar proliferates were only partly CK14<sup>+</sup> (**Fig. 4 B**).

301 In contrast to the CK14<sup>+</sup> progenitors, we observed no major contribution of club cells  
302 in the alveolar proliferative response during early infection (**Fig. 4 C**). The number of  
303 SCGBA1<sup>+</sup> club cells in the airways remained similar in mock-infected animals at all  
304 time-points. In SARS-CoV-2 infected animals, the number of SCGB1A1<sup>+</sup> cells in the  
305 airways was mildly increased compared to mock at 6 dpi (**Fig. 4 C**). SCGB1A1 was  
306 not expressed in alveolar proliferations at 3 and 6 dpi. Interestingly, SCGB1A1<sup>+</sup> cells  
307 significantly increased in the alveoli of SARS-CoV-2 infected animals at 14 dpi. The  
308 expression was limited to the airway-like, peri-bronchiolar proliferates, in which up to  
309 40% of cells were SCGB1A1<sup>+</sup> club cells (**Fig. 4 C**).

310 Therefore, we concluded that CK14<sup>+</sup> cells are the airway progenitors that mainly  
311 contribute to alveolar regeneration in SARS-CoV-2 infected hamsters. These cells  
312 probably have their origin in a common  $\Delta$ NP63<sup>+</sup>CK5<sup>+</sup>CK14<sup>+</sup> basal cell pool, but  
313 represent a subset that loses CK5 and partly  $\Delta$ NP63 expression upon migration into  
314 the alveoli.

315 Next, we aimed to determine the fate of the CK14<sup>+</sup> cells. Double-labeling with proSP-  
316 C revealed clusters of CK14<sup>+</sup>proSP-C<sup>+</sup> cells in the peri-bronchiolar pods and  
317 occasionally within the lining of terminal bronchioles. This indicates a potential  
318 differentiation of airway progenitors towards the AT2 lineage (**Fig. 4 D**; Supplem. Fig.  
319 7 A-B). Interestingly, at the edges of the peri-bronchiolar proliferates, some CK14<sup>+</sup> cells  
320 showed a transition from a cuboidal to an elongated shape typical of ADI cells. Co-  
321 staining with CK8 showed a gradual phenotypical change in the direction of alveoli.  
322 Cells exiting the bronchiole showed a cuboidal morphology and a diffuse cytoplasmic  
323 CK14 expression. Towards alveoli, the cuboidal cells co-expressed CK14 and CK8.  
324 More distally, cells became more elongated and were characterized by CK14-CK8<sup>+</sup>  
325 immunolabeling (**Fig. 4 E**; Supplem. Fig. 7 C-D). Therefore, we concluded that airway  
326 progenitors can differentiate into AT2 but also directly into the ADI state. These  
327 transitions were mainly observed at 6 dpi. In contrast, at 14 dpi, peri-bronchiolar CK14<sup>+</sup>  
328 cells partly co-expressed SCGB1A1, indicating a club cell differentiation (**Fig. 4 F**;  
329 Supplem. Fig. 7 E-F). Hence, we concluded that the increased number of alveolar  
330 SCGB1A1<sup>+</sup> cells we observed at this time point was most likely the result of *in situ*  
331 differentiation of CK14<sup>+</sup> cells. However, we cannot exclude that SCGB1A1<sup>+</sup> club cells  
332 also proliferated and migrated out of the bronchioles to give rise to alveolar cells at 14  
333 dpi.

334 Lastly, we wanted to confirm our findings in lethal COVID-19 ARDS and non-COVID-  
335 19 bronchopneumonia samples. CK14 and SCGB1A1 expression was only detected  
336 within the airways, never in the alveoli. However, our samples did not show areas of  
337 peri-bronchial epithelial alveolar proliferation as described in the hamsters. The  
338 absence of these lesions was probably due to the early phase of the lesions in the  
339 available samples.

340 In summary, our findings indicate that multipotent CK14<sup>+</sup> airway basal cell progenitors,  
341 probably arising from a CK14<sup>+</sup>CK5<sup>+</sup>ΔNP63<sup>+</sup> basal cell pool, proliferate and migrate to  
342 alveoli following SARS-CoV-2 induced DAD in hamsters. These cells have the  
343 potential to differentiate into distinct lineages, including AT2, ADI and club cells,  
344 depending on the timing and localization.

#### 345 **4. Hamsters show dysregulated alveolar regeneration and fibrosis** 346 **following SARS-CoV-2 induced DAD**

347 SARS-CoV-2 NP antigen was no longer detectable in the lung 1 week after infection.  
348 However, ADI cells and airway progenitors were still present in the alveoli at 14 dpi,  
349 indicative of protracted regeneration. Moreover, 7 out of 9 animals showed multifocal,  
350 variably sized, well demarcated areas with sub-pleural aggregates of spindle cells and  
351 abundant, pale, fibrillary, extracellular material (**Fig. 5 A**). Azan staining confirmed  
352 deposition of collagen in these areas (**Fig. 5 B**). Immunohistochemistry for  $\alpha$ -smooth  
353 muscle actin ( $\alpha$ -SMA) demonstrated the presence of myofibroblasts (**Fig. 5 C**). The  
354 fibrotic areas encompassed from 0.59 to 2.35 % of the evaluated lung tissue area (**Fig.**  
355 **5 E**). The persistence of ADI in fibrotic lungs has been described in COVID-19 patients  
356 <sup>9,10</sup> as well as on a mouse model of COVID-19 <sup>42</sup>. Interestingly, both studies report the  
357 presence of a pro-fibrotic inflammatory cell population, including M2 macrophages.  
358 Since M2 macrophages also stimulate the proliferation of mesenchymal cells, mainly  
359 fibroblasts and myofibroblasts as well as collagen production <sup>18,19,21</sup>, we wanted to  
360 determine if the persistence of M2 macrophages and ADI cells at 14 dpi is locally  
361 associated with fibrotic lesions in hamsters. Thus, we performed  
362 immunohistochemistry for CD204. CD204<sup>+</sup> M2-type macrophages were frequently  
363 detected within and around fibrotic areas (**Fig. 5 D**). The number of CD204<sup>+</sup> cells was  
364 significantly higher in SARS-CoV-2 infected animals compared to the mock group at 3,  
365 6 and 14 dpi (**Fig. 5 F**).

366 In summary, our findings showed an incomplete restoration of alveolar structures with  
367 persistence of ADI cells and M2-type macrophages, as well as onset of sub-pleural  
368 fibrosis two weeks after infection. These findings indicate that SARS-CoV-2-induced  
369 DAD results in dysregulated, inefficient, or delayed alveolar regeneration leading to  
370 irreversible damage in hamsters.

## 371 **5. Single-cell transcriptome analysis confirms ADI cell persistence** 372 **following SARS-CoV-2 induced DAD in hamsters**

373 As described above, we demonstrated that ADI cells with features previously described  
374 in mouse models of lung regeneration as well as in COVID-19 patients are participating  
375 in alveolar regeneration following SARS-CoV-2 infection of hamsters. To confirm this  
376 observation with data from an independent experiment, we re-analyzed a previously  
377 published single-cell RNASeq dataset (GSE162208) generated in SARS-CoV-2  
378 infected Syrian golden hamsters<sup>43</sup>. The experiment was performed with a study design  
379 similar to ours. We focused our analysis on data from SARS-CoV-2-infected animals  
380 sacrificed at 5 and 14 dpi. First, we generated a Uniform Manifold Approximation and  
381 Projection (UMAP) clustering all cell populations detected in the datasets. We then  
382 identified alveolar cells based on the expression of AT1 and AT2 markers (*Rtkn2* and  
383 *Lamp3*, respectively), as described in the original publication (**Fig. 6 A, G**,<sup>43</sup>. These  
384 cells were re-clustered according to differences in gene expression, resulting in 7 and  
385 11 clusters at 5 and 14 dpi, respectively. Next, we determined the top 10 differentially  
386 expressed genes (DEGs) in each cluster and compared the sets of DEGs with gene  
387 signatures described in mouse models of lung regeneration<sup>19,20</sup> as well as COVID-19  
388 patients<sup>9</sup>. Within the DEGs, we detected genes typically expressed by AT1, AT2, ADI  
389 cells, club cells or ciliated cells in mice and/or humans, and we generated lists of  
390 candidate marker genes for these cell types in the hamster. Next, we evaluated the  
391 expression of these candidate markers within the clusters and removed genes with low  
392 specificity from the lists. The final, hamster-specific marker gene lists are given in  
393 supplementary table 1. The module scores of the respective marker sets at 5 and 14  
394 dpi are visualized in **Fig. 6 B-F; H-L**.

395 At 5 dpi, the AT1 marker *Rtkn2* was expressed in a small number of cells in clusters 2  
396 and 6 (**Fig. 6 A**). The AT2 marker *Lamp3* was mostly expressed in many cells within a  
397 separate cell population, comprised of clusters 0, 1, 3, 4 and 5. Interestingly, *Lamp3*  
398 was also detected in some cells within cluster 2, indicating a mixed composition of this

399 cluster (**Fig. 6 A**). Many cells did not express any one of the two genes. Applying the  
400 module scores algorithm with sets of multiple marker genes allowed a distinction of  
401 mature and transitional alveolar cell types. Mature AT1 marker genes scored high in  
402 cluster 6 and partly in cluster 2, in line with the distribution of *Rtkn2* expression (**Fig. 6**  
403 **B**). Mature AT2 genes showed positive scores in clusters 0, 1, 3, 4 and 5 (**Fig. 6 C**),  
404 but not within the AT1 clusters. Positive scores for ADI marker genes were detected  
405 throughout clusters 2 and 6 and partly in cluster 5 (**Fig. 6 D**). Importantly, high scores  
406 were observed in the cells that did not score for markers of mature AT1 and AT2 cells.  
407 Interestingly, clusters showing high expression of AT2 genes also partly showed high  
408 scores for club cell genes (cluster 1, and 3, **Fig. 6 E**). A group of cells within cluster 5  
409 only scored high for club cell genes (**Fig 6 E**). A few cells within cluster 1 scored high  
410 exclusively for gene markers of ciliated cells (**Fig. 6 F**).

411 At 14 dpi, the AT1 marker *Rtkn2* was expressed in clusters 0, 2, 3, 5, 7 and 9. The  
412 number of *Rtkn2*-positive cells was higher compared to 5 dpi. Similar to 5 dpi, *Lamp3*  
413 was expressed in a separate population (clusters 1, 4, 6, and 8) and also partly within  
414 the AT1 cell clusters (**Fig. 6 G**). Again, many cells were negative for both genes.  
415 Module scores for AT1 genes were high only in three clusters expressing *Rtkn2* (2, 5  
416 and 7, **Fig. 6 H**). AT2 genes scored high in 4 clusters (1, 4, 6 and 8, **Fig 6 I**).  
417 Interestingly, the majority of cells within three clusters (0, 3 and 9) showed no positive  
418 scores for either AT1 or AT2 gene sets, but scored high for ADI marker genes (**Fig 6**  
419 **J**). The number of cells with high scores for ADI cell genes was higher compared to 5  
420 dpi. Similar to 5 dpi, a positive score for club cell genes was detected within AT2  
421 clusters (cluster 6 and 8, **Fig. 6 K**). In addition, a positive score for club cells genes  
422 was observed in some cells within one of the ADI cell clusters (cluster 3). Cluster 10  
423 separated completely from the other populations and showed a high score for ciliated  
424 cell markers (**Fig. 6 L**).

425 Taken together, transcriptome analysis identified AT1, AT2 and ADI cells in SARS-  
426 CoV-2-infected hamsters. At 5 dpi, ADI cells did not form a separate cluster, but were  
427 admixed with AT1 and AT2 cells. At 14 dpi, ADI cells were more numerous and  
428 clustered separately from AT1 and AT2 cells. Moreover, we found small groups of  
429 ciliated cells admixed within the alveolar cell populations and partial expression of club  
430 cell genes within ADI and AT2 cells.

431 Next, we wanted to investigate the expression of genes belonging to pathways  
432 involved in lung regeneration and we performed module score analysis with hallmark  
433 gene lists (<http://www.gsea-msigdb.org/gsea/msigdb/index.jsp>): *P53 pathway*, *DNA repair*,  
434 *TGF beta signaling*, *notch signaling*, *wnt beta catenin signaling*, *epithelial*  
435 *mesenchymal transition (EMT)*, and *angiogenesis*. As described above, ADI cells in  
436 mice and humans express Tp53 and other markers of cell cycle arrest and DNA repair.  
437 The transcriptome data showed that a fraction of cells with an ADI signature showed  
438 high positive scores for *p53 pathway* genes at 5 and 14 dpi (**Fig 7 A,B**). At 5 dpi, almost  
439 all clusters showed positive scores for *DNA repair* genes, with the highest scores  
440 observed in AT1/ADI and cells with a ciliated cell signature (**Fig 7 C**). At 14 dpi, mainly  
441 AT1/ADI and ADI clusters displayed positive scores (**Fig. 7 D**). The AT2-ADI-AT1  
442 trajectory is regulated by different signaling pathways, including TGF beta -, notch -  
443 and wnt beta catenin signaling and involves the EMT process<sup>19,44</sup>. At 5 and 14 dpi,  
444 only a few cells with ADI signature showed high positive scores for *TGF beta signaling*  
445 (**Fig. 7 E-F**). A minimal number of AT2 cells revealed a high positive score for *notch*  
446 *signaling* hallmark genes at 5 dpi, whereas variably positive scores were distributed  
447 within AT2, ADI and AT1/ADI cells at 14 dpi (**Fig. 7 G-H**). A small number of cells within  
448 the AT1/ADI cluster revealed high positive scores for *wnt beta catenin signaling*  
449 hallmark genes at 5 dpi (**Fig. 7 I**). At 14 dpi, larger numbers of cells within AT1/ADI and  
450 ADI clusters as well as a small number of cells within the AT2 clusters showed positive  
451 scores for *wnt beta catenin signaling* hallmark genes (**Fig. 7 J**). AT1/ADI clusters as  
452 well as cells with an ADI signature within the AT2 clusters showed a high positive score  
453 for *EMT* hallmark genes at 5 dpi (**Fig. 7 K**). At 14 dpi, some AT1/ADI cells showed  
454 positive scores for *EMT* hallmark (**Fig. 7 L**). Finally, we investigated the expression of  
455 genes involved in angiogenesis, since this process is upregulated in late phases of  
456 DAD, in the context of fibrosis<sup>45</sup>. A small number of cells within the AT1/ADI cluster at  
457 5 dpi and a higher number of cells within the AT1/ADI and ADI clusters at 14 dpi  
458 revealed high positive scores for *angiogenesis* hallmark genes (**Fig. 7 M-N**).

459 In summary, the findings from the independent study confirmed that ADI cells are a  
460 feature of alveolar regeneration in hamsters on a transcriptome level, supporting the  
461 morphologic observations from our experiment. Moreover, the data shows that i) the  
462 number of AT1 cells increased from 5 to 14 dpi, indicative of progressive alveolar  
463 regeneration, ii) cells with an ADI gene signature can be distinguished within AT1 and  
464 AT2 populations and they become more distinct and numerous at 14 dpi, iii) ADI cells

465 partly express genes belonging to the P53 and DNA repair pathway as well as TGF  
466 beta -, notch- and *wnt beta catenin* signaling, EMT and angiogenesis pathways iv) club  
467 cell genes are partly expressed in AT2 and ADI cells at 14 dpi in SARS-CoV-2 infected  
468 hamsters.

469

## 470 Discussion

471 The COVID-19 pandemic has claimed many lives and challenged the global healthcare  
472 system in an unprecedented way. Survivors of acute disease may be faced with a wide  
473 spectrum of long-lasting symptoms, with pulmonary, neuropsychiatric and  
474 cardiovascular sequelae at the forefront, which have a negative impact on the quality  
475 of life. Considering the staggering amount of patients reporting prolonged symptoms  
476 even as long as 15 months after the initial onset of COVID-19 <sup>2,7,46,47</sup>, further research  
477 into potential pathomechanisms of this protracted recovery is urgently needed <sup>48</sup>. A  
478 possible explanation for the mechanisms underlying some PASC symptoms, such as  
479 dyspnea, shortness of breath and exercise intolerance, is an impaired regeneration of  
480 alveolar tissue and lung fibrosis <sup>3,9</sup>. It has also been suggested that the persistence of  
481 CK8<sup>+</sup> ADI cells might be the cause of prolonged hypoxemia in COVID-19 patients <sup>8</sup>.  
482 Importantly, these conclusions are based on observations from tissues collected from  
483 acute, lethal COVID-19 cases. In contrast, we can only speculate about the presence  
484 of these cells in PASC, since samples from affected humans are scarce. Therefore,  
485 establishment and further characterization of appropriate animal models of PASC are  
486 urgently needed.

487 SARS-CoV-2 infected hamsters reliably phenocopy COVID-19 <sup>28</sup>. Recovering  
488 hamsters show a pronounced epithelial cell proliferation within airways and alveoli <sup>31</sup>.  
489 Foci of alveolar regeneration, usually termed AT2 hyperplasia, arise approximately 4  
490 – 5 dpi <sup>31,49</sup>. This process becomes more prominent around 6 – 7 dpi <sup>27,31</sup> and it has  
491 been reported to persist at least up to 31 dpi <sup>31 32</sup>. In line with these reports, we  
492 observed epithelial proliferates starting at 3 dpi in the present study. These peaked at  
493 6 dpi and persisted until 14 dpi. In the next step, we went further and characterized the  
494 proliferating epithelial cell types in more detail. First, we characterized the AT2-ADI-  
495 AT1 trajectory. In mouse models of lung injury, the transition from AT2 to the ADI state  
496 is characterized by progressive decrease of cell sphericity, expression of CK8 and loss  
497 of AT2 marker expression <sup>8,19-21</sup>. Double-labelling of SPC and CK8 demonstrated the

498 transition of AT2 to ADI cells, associated with phenotypical changes as described  
499 above in SARS-CoV-2-infected hamsters. CK8<sup>+</sup> ADI cells were first detected at 3 dpi.  
500 At 6 dpi, all phases of ADI cells were observed, including round, SPC<sup>+</sup>CK8<sup>+</sup> cells (early  
501 ADI stage) and polygonal, plump to elongated, SPC<sup>-</sup>CK8<sup>+</sup> cells (late ADI stage).  
502 Interestingly, at 14 dpi, we observed numerous round, SPC<sup>+</sup>CK8<sup>+</sup>, early ADI stages  
503 and fewer late ADI stages, which could indicate a new wave of ADI cell generation at  
504 this time-point. Lineage tracing studies in the mouse bleomycin lung injury model  
505 demonstrated that ADI cells could develop from AT2 as well as from MHCII<sup>+</sup> club cells  
506 migrating from the airways<sup>19</sup>. In early stages after injury, peaking at 5 dpi, ADI cells  
507 are mainly derived from AT2 cells, while club cell-derived ADI cells appear later,  
508 peaking at 10 dpi. Of note, a part of the MHCII<sup>+</sup> club cells differentiating towards ADI  
509 cells goes through an SPC<sup>+</sup> stage<sup>19</sup>. We speculate, that the round SPC<sup>+</sup>CK8<sup>+</sup> ADI cells  
510 observed at 14 dpi in SARS-CoV-2 infected hamsters could be derived from airway  
511 progenitors analogous to murine MHCII<sup>+</sup> club cells, which transiently assume an AT2  
512 stage.

513 In addition to the demonstration of transitional cells stages in tissue sections, we also  
514 confirmed the presence of ADI cells in the hamster model of COVID-19 on a  
515 transcriptome level, using published single cell RNA-Seq data from an independent  
516 experiment. In addition, we created hamster-specific marker gene lists for different  
517 alveolar cell populations, including AT1, ADI and AT2 cells. Importantly, numerous  
518 cells with an ADI gene signature were detected at 14 dpi, which is indicative of an  
519 ongoing regenerative process at this time point and in line with the results obtained by  
520 the quantification of CK8 positive cells by immunolabeling. At 5 dpi, cells with ADI gene  
521 expression clustered with AT1 and AT2 cells, suggestive of an AT2 origin. Interestingly,  
522 at 14 dpi, ADI gene expression was not found within the AT2 clusters. At this time point,  
523 a small number of ADI cells expressed a club cell signature. This observation  
524 reinforces the hypothesis, that two waves of ADI cells are generated in the course of  
525 SARS-CoV-2 infection of hamsters, which have their origin in AT2- and club cells,  
526 respectively.

527 CK8<sup>+</sup>ADI cells in SARS-CoV-2 infected hamsters frequently expressed nuclear TP53  
528 protein. Transcriptome data also showed that some cells with ADI gene signature  
529 displayed high scores for P53 pathways and for DNA repair hallmark genes at 5 and  
530 14 dpi. Nuclear TP53 regulates transcription of genes involved in cell cycle arrest and



531 DNA repair<sup>50</sup>. It has been demonstrated, that ADI cells exit the cell cycle before their  
532 differentiation into AT1 cells. Thus, nuclear TP53 expression in the hamster ADI cells  
533 could be an indicator of this transient stage before differentiation and part of a  
534 physiologic process<sup>19,21,44</sup>. On the other hand, accumulation of TP53 is also detected  
535 in cells with high level of DNA damage. ADI cells undergo mechanical stretch-induced  
536 DNA damage, caused while migrating to cover the denuded septa and to differentiate  
537 into AT1<sup>21,51</sup> and the nuclear expression of TP53 could reflect a particularly high level  
538 of injury, triggering DNA repair mechanisms. It is important to underline that in SARS-  
539 CoV-2 infected hamsters, TP53 nuclear expression was often found in hypertrophic  
540 CK8<sup>+</sup> cells with a bizarre morphology, binucleation or karyomegaly. We hypothesize  
541 that these hypertrophic cells have accumulated a high level of DNA damage, are  
542 blocked in the ADI stage and are not likely to differentiate into slender AT1 cells. A  
543 permanent block in the ADI cell state has been described in IPF and mouse models of  
544 lung fibrosis<sup>8,20,42,52</sup>. Importantly, it has been demonstrated in a mouse model that  
545 induction of TP53-dependent AT2 senescence is sufficient to propagate progressive  
546 pulmonary fibrosis<sup>44,52</sup>. Besides TP53, other signaling pathways have been implicated  
547 in ADI cell senescence. For instance, *in vitro* studies in primary murine cells revealed  
548 that a chronic activation of WNT/ $\beta$ -catenin signaling can induce senescence and CK8  
549 expression in ADI cells<sup>44,53</sup>. In addition, persistent Notch activation in AT2 cells induces  
550 retarded differentiation of AT2 into AT1 cells, resulting in ADI cell accumulation in a  
551 *Pseudomonas* lung injury model<sup>44,54</sup>. Moreover, persistent TGF- $\beta$  signaling has been  
552 shown to block ADI cells from differentiating into AT1 cells<sup>20</sup>. We showed that, from 5  
553 to 14 dpi, an increasing number of cells with ADI gene signature had high scores for  
554 *Wnt/  $\beta$ -catenin* and *notch signaling* hallmark genes. In contrast, genes belonging to the  
555 TGF-  $\beta$  signaling pathway showed no high scores at 14 dpi and were only detected in  
556 a small fraction of ADI cells at 5 dpi. Therefore, we speculate that prolonged Wnt/  $\beta$ -  
557 catenin and/or notch signaling, rather than excessive TGF-  $\beta$ , could be responsible for  
558 the prolonged presence of ADI cells in SARS-CoV-2 infected hamsters. However, the  
559 available data do not allow us to assess the duration of the activation of the respective  
560 pathways in ADI cells and further studies with a more detailed analysis and additional  
561 time points are warranted to confirm this hypothesis. Besides dysregulation of the  
562 discussed pathways, a direct contribution of viral infection to the induction of  
563 senescence must be considered. It has been demonstrated that SARS-CoV-2 and  
564 other viruses can induce cellular senescence in infected AT2 cells<sup>55</sup>.

565 The high number of ADI cells and the expression of genes associated with ADI cell  
566 persistence observed in SARS-CoV-2 infected hamsters at 14 dpi could indicate that  
567 viral infection dysregulates ADI cell differentiation and contributes to delayed  
568 regeneration or fibrosis in this model. However, the clinical relevance of this  
569 dysregulation deserves further investigations. In COVID-19 patients with a severe  
570 disease course and lethal outcome, high numbers of ADI cells can be detected, which  
571 indicates that dysregulated alveolar regeneration could play a role in the pathogenesis  
572 of severe disease <sup>8,9</sup>. In line with this, we found that TP53 is expressed by CK8<sup>+</sup> ADI  
573 cells in lethal COVID-19 samples, but not in CK8<sup>+</sup> ADI cells in a non-COVID pneumonia  
574 case. We did not find fibrosis in our human samples, which could be due to the short  
575 duration of disease in the donors. This is in line with a previous report demonstrating  
576 TP53 expression in ADI cells without evidence of fibrosis in lethal COVID-19 <sup>8</sup>. Even  
577 in the absence of fibrosis, a persistence of ADI cells could contribute to a prolonged  
578 impairment of gas exchange and ventilator dependence in patients with severe acute  
579 COVID-19 <sup>8</sup>. Moreover, in survivors of this acute stage, TP53-mediated ADI cell  
580 senescence might be involved in the reported rapid onset fibrosis and respiratory  
581 symptoms of PASC (<sup>9,12</sup>.

582 In addition to the presence of ADI cells, fibrotic processes were also a feature of SARS-  
583 CoV-2 infection in the hamsters of our study, in line with other similar reports <sup>56,57</sup>. The  
584 majority of infected animals showed foci of sub-pleural fibrosis at 14 dpi, indicative of  
585 irreversible damage/remodeling. This pattern of fibrosis is similar to what has been  
586 described in IPF patients <sup>23,58</sup> and a RhoGTPase Cdc42 deletion mouse model of  
587 progressive pulmonary fibrosis. In these conditions, a progression of fibrotic lesions  
588 from periphery to center is typically encountered <sup>19,23</sup>. Subpleural alveoli are subject to  
589 increased mechanical tension during respiration, which has been shown to activate  
590 TGF- $\beta$ -mediated pro-fibrotic processes <sup>23,58</sup>. It remains unclear, whether the fibrosis in  
591 our hamsters at 14 dpi would also progress towards centers in later stages, since the  
592 study did not include longer time points. In addition to fibrotic foci, our study also  
593 revealed a prominent presence of CD204<sup>+</sup> M2 macrophages starting at 3 dpi and  
594 persisting until 14 dpi. M2-macrophages are known to promote fibrosis by a variety of  
595 factors, including TGF- $\beta$  secretion <sup>59</sup>. Thus, the fibrosis could be promoted by the  
596 prolonged presence of an unfavorably polarized inflammatory response. In addition to  
597 macrophages, AT2 cells can promote a pro-fibrotic microenvironment by activating  
598 local fibroblasts to become myofibroblasts via paracrine signaling, as demonstrated *in*

599 *vitro*<sup>45,60,61</sup>. This process was initiated by an induction of an EMT process in the AT2  
600 cells<sup>52,61</sup>. Of note, it has been reported that EMT is activated in ADI cells<sup>19</sup> and the  
601 results from our transcriptome analysis showed that cells with ADI gene signature  
602 score high for EMT pathway gene expression at 5 and 14 dpi in SARS-CoV-2 infected  
603 hamsters. Therefore, besides M2-macrophages, ADI cells potentially contribute to a  
604 pro-fibrotic microenvironment. In addition, it has been reported that lung fibrotic lesions  
605 in COVID-19 patients are preceded by a prolonged blood vessel neo-formation<sup>62</sup>.  
606 Interestingly, transcriptome data revealed that numerous cells within AT1/ADI and ADI  
607 cell clusters showed high positive scores for *angiogenesis* hallmark genes at 14 dpi,  
608 suggesting that ADI cells in hamsters might contribute also to a pro-angiogenetic  
609 microenvironment, promoting vascular changes during lung fibrosis similar to COVID-  
610 19 patients. A recent study in a mouse model of COVID-19 demonstrated that aged  
611 mice infected with a mouse adapted strain of SARS-CoV-2 show fibrotic lesions  
612 starting from 15 dpi and persisting up to 120 dpi<sup>42</sup>. Similar to what we observed in the  
613 hamster model, the lesions were characterized by a subpleural deposition of collagen  
614 and presence of  $\alpha$ -SMA-positive myofibroblasts. The authors also described elevated  
615 numbers of M2-type macrophages, which persisted in chronic lesions. Moreover, this  
616 study also analyzed the dynamics of AT2-derived ADI cells and demonstrated that  
617 persistence of ADI cells is a feature of chronic lesions, in line with our findings in the  
618 hamster model. In contrast to our results, the study did not report a contribution of  
619 airway progenitor cells to alveolar regeneration.

620 Although pre-existing AT2 cells are described to be the predominant source of AT1s  
621 after alveolar damage, it is known that other cell types partake in regenerative  
622 processes, especially after severe injury<sup>15,39</sup>. In case of severe damage that involve  
623 broad epithelial denudation, basal cells can migrate into alveoli, become distal basal-  
624 like cells and subsequently promote alveolar regeneration giving rise to AT2<sup>15,37,44</sup>. A  
625 contribution of airway progenitors to alveolar repair has been reported in COVID-19  
626 patients<sup>24,63</sup>. Here, we showed that airway progenitors are likely to contribute to  
627 alveolar regeneration in the hamster model as well. In COVID-19 patients the most  
628 prominent airway progenitors supporting alveolar regeneration were reported to be  
629 CK5<sup>+</sup> basal cell, which form the so-called "keratin 5 pods". Basal cell expansion, also  
630 termed "pod" is gradually recognized as common feature of epithelial remodeling<sup>(17,44</sup>.  
631 To a lesser extent, more immature CK5<sup>+</sup>p63<sup>+</sup> basal cells were also reported to support  
632 alveolar regeneration in COVID-19 patients<sup>37</sup>. Conversely, in SARS-CoV-2 infected

633 hamsters, we found predominantly CK14<sup>+</sup> cells within alveolar proliferation foci,  
634 resembling the human CK5<sup>+</sup> pods. Scattered throughout alveolar proliferations,  
635 CK14<sup>+</sup>p63<sup>+</sup> cells were also detected. Basal airways cells originate from the same  
636 CK5<sup>+</sup>CK14<sup>+</sup>p63<sup>+</sup> pool that gives rise to different combinations of CK5<sup>+/-</sup>, CK14<sup>+/-</sup>, p63<sup>+/-</sup>  
637 progenitor cells that will populate the airways<sup>40</sup>. Some of these cells also have the  
638 potential to give rise to AT2 cells<sup>39,40</sup>. It appears that the subpopulation might differ  
639 among various species. Human lung multipotent cells can differ from murine ones, and  
640 in its turn, we might expect the same for other rodents like hamsters. The CK14<sup>+</sup> basal  
641 cells detected in our study were having similar features like the ones described for  
642 human CK5<sup>+</sup> cells, namely pods formation and likelihood to give rise to AT2 cells as  
643 suggested by CK14<sup>+</sup>SPC<sup>+</sup> cells within epithelial regeneration foci. For these reasons,  
644 we postulate that the abundant CK14<sup>+</sup> and the rare CK14<sup>+</sup>p63<sup>+</sup> basal cells detected in  
645 SARS-CoV-2 infected hamsters are the equivalent of the CK5<sup>+</sup> cells detected in COVID  
646 patients, partaking in alveolar regeneration.

647 The authors recognize that the study has some limitations. First, this work provides a  
648 whole slide digital quantification of the main cell types involved in alveolar regeneration  
649 upon SARS-CoV-2 infection, including CK8<sup>+</sup> ADI cells. However, since that several  
650 tested antibodies (anti-AGER, -AQP5, -PDPN) failed to specifically recognize AT1 cells  
651 in hamsters, a quantification of these cells and demonstration of ADI-AT1 transition by  
652 double-labeling was not possible. Therefore, the ADI-AT1 transition was demonstrated  
653 with ultrastructural analysis, in line with previous COVID-19 reports. Second, we can  
654 only speculate on the clinical relevance ADI persistence and fibrotic lesions in the  
655 animals. However, once that this work confirmed hamsters to be a reliable model for  
656 these features of PASC, further investigations including the assessment of lung  
657 function and gas-exchange capacity are warranted, which should also include longer  
658 time points. Third, the conclusions regarding cell origins in this work are based on  
659 double-labelling and co-expression of genes interpreted in the context of published  
660 literature. Additional studies involving lineage-tracing are required to irrefutably prove  
661 cell trajectories.

662 In summary, our study provides a detailed characterization of the epithelial regenerative  
663 response in the hamster model of COVID-19. We show that ADI cells and airway-derived  
664 progenitors participate in alveolar regeneration in the species, and provide evidence of  
665 incomplete regeneration post virus-clearance, including the persistence of ADI cells, M2-  
666 type macrophage infiltration and subpleural fibrosis. All of these features have been

667 demonstrated in COVID-19 patients and are implemented in the development of PASC  
668 <sup>10</sup>. Therefore, we confirm the value of the Syrian golden hamster to model long-term  
669 sequelae to acute SARS-CoV-2 infection. Currently, there is very limited information  
670 about the pathologic characteristics and underlying molecular mechanisms of respiratory  
671 PASC. There is an urgent need for animal models that would allow the development of  
672 specific biomarkers of early lesions and the testing of targeted therapeutic approaches,  
673 like anti-fibrotic and anti-inflammatory agents. So far, only one recent publication has  
674 addressed this gap in a mouse model of COVID-19 <sup>42</sup>. Here, we provide an additional  
675 small animal model that can complement future research on SARS-CoV-2 induced  
676 pulmonary fibrosis. Since post-COVID-19 pathological lesions show overlap with other  
677 diseases featuring DAD and IPF, the model can be used for broader implications. In the  
678 next step, this model should be used to test the potential of compounds to prevent or  
679 reduce PASC and other lung diseases. Senolytic drugs have been tested in hamster  
680 model of COVID-19 and have been shown to mitigate acute lung disease <sup>55</sup>, but long-  
681 term effects have not been investigated yet. It would be interesting to see whether an  
682 early intervention with these drugs also reduces the incidence of senescent ADI and, as  
683 a consequence, prevents fibrosis.

684

685

## 686 **Material and methods**

687 **Hamster study.** The animal experiment was in accordance with the EU directive  
688 2010/63/EU and approved by the relevant local authorities (protocol code N032/2020  
689 22 April 2020). During the experiment the animals were under veterinary observation  
690 and all efforts were made to minimize distress. Eight to ten weeks old male and female  
691 Syrian golden hamsters (*Mesocricetus auratus*) purchased from Janvier Labs were  
692 housed under BSL-3 conditions for 2 weeks prior the experiment for acclimatization. A  
693 total of 80 hamsters divided into groups of 5 male and 5 female (n=10) animals per  
694 time point per infection group were housed in isolated ventilated cages under  
695 standardized conditions (21 ± 2 °C, 40 – 50 % relative humidity, 12:12 light-dark cycle,  
696 food and water ad libitum) at the Heinrich Pette Institute, Leibniz Institute for  
697 Experimental Virology in Hamburg, Germany. Animals were infected with an intranasal  
698 inoculation of either a suspension containing 10<sup>5</sup> plaque-forming units (pfu) of SARS-  
699 CoV2 (SARS-CoV-2/Germany/Hamburg/01/2020; ENA study PRJEB41216 and

700 sample ERS5312751) or phosphate-buffered saline (PBS, control) as previously  
701 described <sup>64</sup> under general anaesthesia. At 1, 3, 6 and 14 days post-infection (dpi),  
702 groups of five female and five male hamsters (n=10) per each treatment (either SARS-  
703 CoV-2 infected or mock infected) were euthanized by intraperitoneal administration of  
704 a pentobarbital-overdose and blood withdrawal by cardiac puncture. Immediately after  
705 death, right lung lobes (*lobus cranialis*, *lobus medius*, *lobus caudalis*, *lobus*  
706 *accessorius*) were collected and fixed in 10 % neutral-buffered formalin (Chemie  
707 Vertrieb GmbH & Co) or 5 % glutaraldehyde (Merck KGaA) for microscopic and  
708 ultrastructural evaluation respectively.

709

710 **Virus.** SARS-CoV-2/Germany/Hamburg/01/2020 (ENA study PRJEB41216 and  
711 sample ERS5312751) was isolated from a nasopharyngeal swab of a confirmed  
712 COVID-19 patient. Stock virus was produced after three serial passages in Vero E6  
713 cells using Dulbecco's Modified Eagle's Medium (DMEM; Sigma) supplemented with  
714 2 % fetal bovine serum, 1 % penicillin-streptomycin and 1 % L-glutamine at 37 °C. The  
715 infection experiment was carried out under biosafety level 3 (BSL-3) conditions at the  
716 Heinrich Pette Institute, Leibniz Institute for Experimental Virology in Hamburg,  
717 Germany.

718

719 **Human samples.** Lung samples were obtained from three patients who died of  
720 respiratory failure caused by severe COVID-19. The patients were two men, aged 76  
721 and 74 years, and one woman, aged 74 years. The patients were hospitalized for 21,  
722 7 and 5 days, respectively, and all received mechanical ventilation. SARS-CoV-2  
723 infection was confirmed by PCR. The lung samples were obtained during autopsy. In  
724 addition, one non-COVID-19 lung sample was obtained from a 66-year-old man who  
725 underwent a lobectomy due to a pulmonary neoplasm. All patients or their relatives  
726 provided written informed consent for the use of their data and samples obtained during  
727 autopsy for scientific purposes. Ethical approval was given by the local institutional  
728 review board at Hannover Medical School (no. 9621\_BO\_K\_2021).

729

730 **Histopathology.** For histopathological evaluation, lung samples were formalin-fixed  
731 and embedded in paraffin. Serial sections of 2µm were cut and stained with

732 hematoxylin and eosin (HE) and Azan trichrome. Qualitative evaluations with special  
733 emphasis on inflammatory and epithelial regenerative processes (HE) as well as on  
734 fibrosis (Azan) were performed in a blinded fashion by veterinary pathologists (FA, LH)  
735 and subsequently reviewed by board certified veterinary pathologist (MCI, WB).

736

737 **Immunohistochemistry.** Immunohistochemistry was performed to detect SARS-CoV-  
738 2 antigen (SARS-CoV-2 nucleocapsid protein), macrophages and dendritic cells (ionized  
739 calcium-binding adapter molecule 1, IBA-1), alveolar pneumocytes type 2 (pro  
740 surfactant protein C), alveolar differentiation intermediate cells (cytokeratin 8), airway  
741 basal cells (cytokeratin 14), club cells (secretoglobin 1A1), and M2 macrophages (CD  
742 204). Immunolabelings were visualized either using the Dako EnVision+ polymer  
743 system (Dako Agilent Pathology Solutions) and 3,3'-Diaminobenzidine  
744 tetrahydrochloride (DAB, Carl Roth) as previously described<sup>35</sup> or using avidin-biotin  
745 complex (ABC) peroxidase kit (Vector Labs) and DAB (Carl Roth) as previously  
746 described<sup>65</sup>. Nuclei were counterstained with hematoxylin. Further details about  
747 primary and secondary antibodies, visualization methods and dilutions used can be  
748 found in supplementary table 2. For negative controls, the primary antibodies were  
749 replaced with rabbit serum or BALB/cJ mouse ascitic fluid, respectively, with the  
750 dilution chosen according to protein concentration of the exchanged primary antibody.  
751 Antibodies were tested on murine and human lung tissue to confirm specificity for the  
752 cells of interest. Subsequently, murine and human tissues were used as positive  
753 controls.

754

755 **Immunofluorescence.** Double labelling immunofluorescence was performed to  
756 investigate different states of alveolar pneumocytes type 2 and alveolar differentiation  
757 intermediate cells, as well as to prove that airways progenitor cells can differentiate  
758 into alveolar cell types. Reaction was carried out as previously described with minor  
759 modifications<sup>66</sup>. Briefly, after deparaffinization, HIER and serum blocking, washing  
760 with PBS in between each step, a dilution containing two primary antibodies was added  
761 and incubated overnight at 4 °C. Afterwards, a dilution containing two secondary  
762 antibodies were incubated for 60 minutes at room temperature in the dark. After  
763 washing with PBS and distilled water, sections were counterstained and mounted  
764 using anti-fade mounting medium containing DAPI (Vectashield®HardSet™, Biozol).

765 Further details about primary and secondary antibodies, visualization methods and  
766 dilutions used can be found in in supplementary table 3. For negative controls, the  
767 primary antibodies were replaced with rabbit serum or BALB/cJ mouse ascitic fluid  
768 respectively with the dilution chosen according to protein concentration of the  
769 exchanged primary antibody.

770

771 **Transmission Electron Microscopy (TEM).** In order to detect AT1 cells with features  
772 of AT2 proving the final trajectory ADI-AT1 in hamsters, transmission electron  
773 microscopy was performed. Reactions were carried out as previously described <sup>64,67</sup>.  
774 Briefly, glutaraldehyde-fixed lung tissue was rinsed overnight in cacodylate buffer  
775 (Serva Electrophoresis GmbH), followed by post-fixation treatment in 1 % osmium  
776 tetroxide (Roth C. GmbH & Co. KG). After dehydration using a graded alcohol series,  
777 samples were embedded in epoxy resin. Representative areas of affected alveoli were  
778 then cut into ultrathin sections, contrasted with uranyl acetate and lead acetate and  
779 subsequently morphologically evaluated using a transmission electron microscope  
780 (EM 10C, Carl Zeiss Microscopy GmbH).

781

782 **Digital image analysis.** To quantify immunolabeled cells in pulmonary tissue, areas  
783 of alveolar epithelial proliferations as well as areas of subpleural fibrosis, slides were  
784 digitized using an Olympus VS200 Digital slide scanner (Olympus Deutschland  
785 GmbH). Image analysis was performed using QuPath (version 0.3.1), an open-source  
786 software package for digital pathology image analysis <sup>68</sup>. For all animals, whole slide  
787 images of the entire right lung were evaluated. or the pro surfactant protein C  
788 (proSPC), cytokeratin 8 (CK8), cytokeratin 14 (CK14), secretoglobin 1A1 (SCGB1A1)  
789 immunolabelings, total lung tissue was first detected automatically using digital  
790 thresholding. Afterwards, regions of interest (ROI) were defined. The ROIs “airways”  
791 (bronchi, bronchioli, terminal bronchioli), “blood vessels”, “affected alveoli” (alveoli that  
792 were involved either in an inflammatory process or in a epithelial regenerative process  
793 or both) and “artifacts” were manually outlined. The area denoted as “total alveoli” was  
794 defined by subtraction of the “blood vessels”, “airways” and “artifacts” ROIs from the  
795 total lung tissue using an automated script. The area denoted as “unaffected alveoli”  
796 (alveoli that were morphologically free from any inflammatory or regenerative process)  
797 was defined by subtracting the ROI “affected alveoli” from the ROI “total alveoli” using



798 an automated script. Using tissue- and marker-specific thresholding parameters,  
799 quantification of immunolabeled cells was achieved by automated positive cell  
800 detection in all ROI. To analyze SARS-CoV-2 NP, IBA-1 and CD204 immunolabeling,  
801 total lung tissue was automatically detected using digital thresholding. Afterwards, only  
802 blood vessels and artifacts were indicated as ROIs and subtracted from the total lung  
803 tissue. Based on tissue and marker specific thresholding parameters, quantification of  
804 immunolabeled cells was then achieved by automated positive cell detection. For  
805 quantification of alveolar epithelial proliferation or subpleural fibrosis, total lung tissue  
806 area was automatically detected using digital thresholding. Subsequently, either  
807 alveolar epithelial proliferations or subpleural fibrosis were marked as ROIs and the  
808 total area was calculated. Finally, the percentage of total lung area affected by either  
809 epithelial proliferations or subpleural fibrosis was obtained. All procedures (tissue  
810 detection, indication of ROIs, positive cell detection) were performed and subsequently  
811 reviewed by at least two veterinary pathologists (FA, GB, LH, MC). Statistical analysis  
812 and graphs design were performed using GraphPad Prism 9.3.1 (GraphPad Software,  
813 San Diego, CA, USA) for Windows™. Single comparison between SARS-CoV-2  
814 infected hamsters and control group were tested with a two-tailed Mann–Whitney-U  
815 test. For multiple comparisons among different time-points data were tested for  
816 significant differences using Kruskal–Wallis tests and corrected for multiple group  
817 comparisons using the Benjamini–Hochberg correction. Statistical significance was  
818 accepted at exact p-values of  $\leq 0.05$ .

819

## 820 **single-cell RNAseq.**

821 Single-cell RNASeq data from lungs of SARS-CoV-2 infected hamsters was obtained  
822 from a publicly available dataset <sup>43</sup>. Data were analyzed using the R software package  
823 (version 3.6.0) <sup>69</sup>. Expression data were downloaded from GEO  
824 (<https://www.ncbi.nlm.nih.gov/geo/>, GSE162208) and Seurat objects (version  
825 Seurat\_3.2.0, <sup>70-73</sup> were generated from h5 files by combining replicate samples from  
826 lung day5 and day14. Pre-processing of data was performed by applying several  
827 Seurat functions: subset (subset = nFeature\_RNA > 200 & nFeature\_RNA < 2500 &  
828 percent.mt < 5), NormalizeData (data), FindVariableFeatures (data, selection.method  
829 = "vst", nfeatures = 2000), ScaleData(data, features = all.genes), and clusters  
830 identified using functions RunPCA(data, features = VariableFeatures (object = data)),

831 FindNeighbors (data, dims = 1:10), FindClusters (data, resolution = 0.5). AT1 and AT2  
832 cell cluster were then identified by using the marker genes *Rtkn2* (AT1) and *Lamp3*  
833 (AT2), respectively, from the original publication <sup>43</sup>. These clusters were selected, then  
834 pre-processed and re-clustered as described above. We then collected more  
835 candidate marker genes for AT1, AT2 and additional cell populations in these clusters  
836 by applying functions FindAllMarkers (pbmc, only.pos = TRUE, min.pct = 0.25,  
837 logfc.threshold = 0.25) and selecting the top 10 markers genes per cluster. We further  
838 identified additional candidate markers from <sup>9,19,43</sup>. We evaluated the specificity of  
839 these candidate markers by visualizing them with the functions FeaturePlot,  
840 DoHeatmap and AddModuleScore. The list of final maintained marker genes is  
841 presented in supplementary table 1. The function AddModuleScore was then used to  
842 visualize the various cell populations and hallmark genes from the GSEA database (<sup>74</sup>  
843 <http://www.gsea-msigdb.org/gsea/msigdb>).

844

#### 845 **Data Availability:**

846 Source data will be provided with this paper.

847

#### 848 **Acknowledgements**

849 The authors are grateful to Julia Baskas, Petra Grünig, Jana-Svea Harre, Kerstin Rohn,  
850 Caroline Schütz, and Kerstin Schöne for excellent technical assistance. This project  
851 was in part supported by the COVID-19 Research Network of the State of Lower  
852 Saxony (COFONI) with funding from the Ministry of Science and Culture of Lower  
853 Saxony, Germany (14-76403-184, project number 5FF22, Federico Armando,  
854 Wolfgang Baumgärtner, Malgorzata Ciurkiewicz). This research was in part supported  
855 by the Deutsche Forschungsgemeinschaft (DFG; German Research Foundation) -  
856 398066876/GRK 2485/1, Wolfgang Baumgärtner, Georg Beythien, Laura  
857 Heydemann). This study was also supported in part by intra-mural grants from the  
858 Helmholtz-Association (Program Infection and Immunity), and NIAID Research Grants  
859 2-U19-AI100625-06 REVISED and 5U19A100625-07 awarded to Klaus Schughart.

860

#### 861 **Author Contributions Statement**

862 The study was designed by FA, WB and MC. The animal experiments were performed  
863 by SS-B, BS, NM-K, SB, MZ and GG. Histology, immunolabelling and electron  
864 microscopy evaluation of hamster tissues was conducted and analyzed by FA, LH,  
865 MC, GB, KB, AB and WB. Pathological analysis of human samples was performed by  
866 MK. scRNA-seq analysis was performed by KS. Data analysis and interpretation were  
867 performed by FA, LH, MC and GB. Figures were prepared by MC, KS and FA. The  
868 original draft was written by LH, MC, FA and KS. The manuscript was reviewed, edited,  
869 and approved by all authors. Funding was acquired by MC, KS and WB. The project  
870 was supervised by WB and FA

871

### 872 **Competing Interests Statement**

873 The authors declare no competing interests.

874

875 **FIGURES:**

876

877 **Figure 1. SARS-CoV-2 infection causes a marked epithelial proliferative**  
878 **response in the hamster lung.**

879 **A** Representative images showing SARS-CoV-2 nucleoprotein (NP) immunolabeling  
880 in one right lung lobe of an infected hamster at 3 days post infection (dpi). The left  
881 panel shows an overview of one right lung lobe and the central panel displays a higher  
882 magnification of viral antigen (brown signal) in the alveoli. Quantification of SARS-CoV-  
883 2 NP<sup>+</sup> cells is shown in the right panel. **B** Representative images showing ionized  
884 calcium-binding adapter molecule 1 (Iba-1) immunolabeling in one right lung lobe of  
885 an infected hamster at 6 dpi. The left panel shows an overview of one right lung lobe  
886 and the central panel display a higher magnification of macrophages/histiocytic cells  
887 (brown signal) in the affected alveoli. Quantification of Iba-1<sup>+</sup> macrophages/histiocytes  
888 is shown in the right panel. **C** Representative images showing histopathological lesions  
889 in a lung lobe of a SARS-CoV-2 infected hamster at 6 dpi. The top left panel shows an  
890 overview of one right lung lobe displaying large areas of alveolar consolidation  
891 (arrows). The top central panel shows a higher magnification of an affected region,  
892 which shows a prominent epithelial proliferation. The quantification of epithelial  
893 proliferations is reported in the top right panel. The percentage of affected area relative  
894 to total lung area is given. The bottom left panel shows strings of plump polygonal or  
895 elongated cells lining alveolar septa (arrows). The bottom central panel shows  
896 proliferation of cuboidal airway epithelial cells forming ribbons and tubules (arrows)  
897 surrounding terminal bronchioles (dotted line). The bottom right panel shows that within  
898 alveolar proliferations, there are cells displaying karyomegaly and atypical mitotic  
899 figures (arrow). Data are shown as box and whisker plots. Data from Iba-1  
900 quantification was tested by two-tailed Mann-Whitney-U test. A p-value of  $\leq 0.05$  was  
901 considered significant. N = 10 animals/group for mock and SARS-CoV-2 respectively.  
902 For quantifications, 1 longitudinal section containing all right lung lobes were  
903 evaluated. Source data will be provided as a source data file.

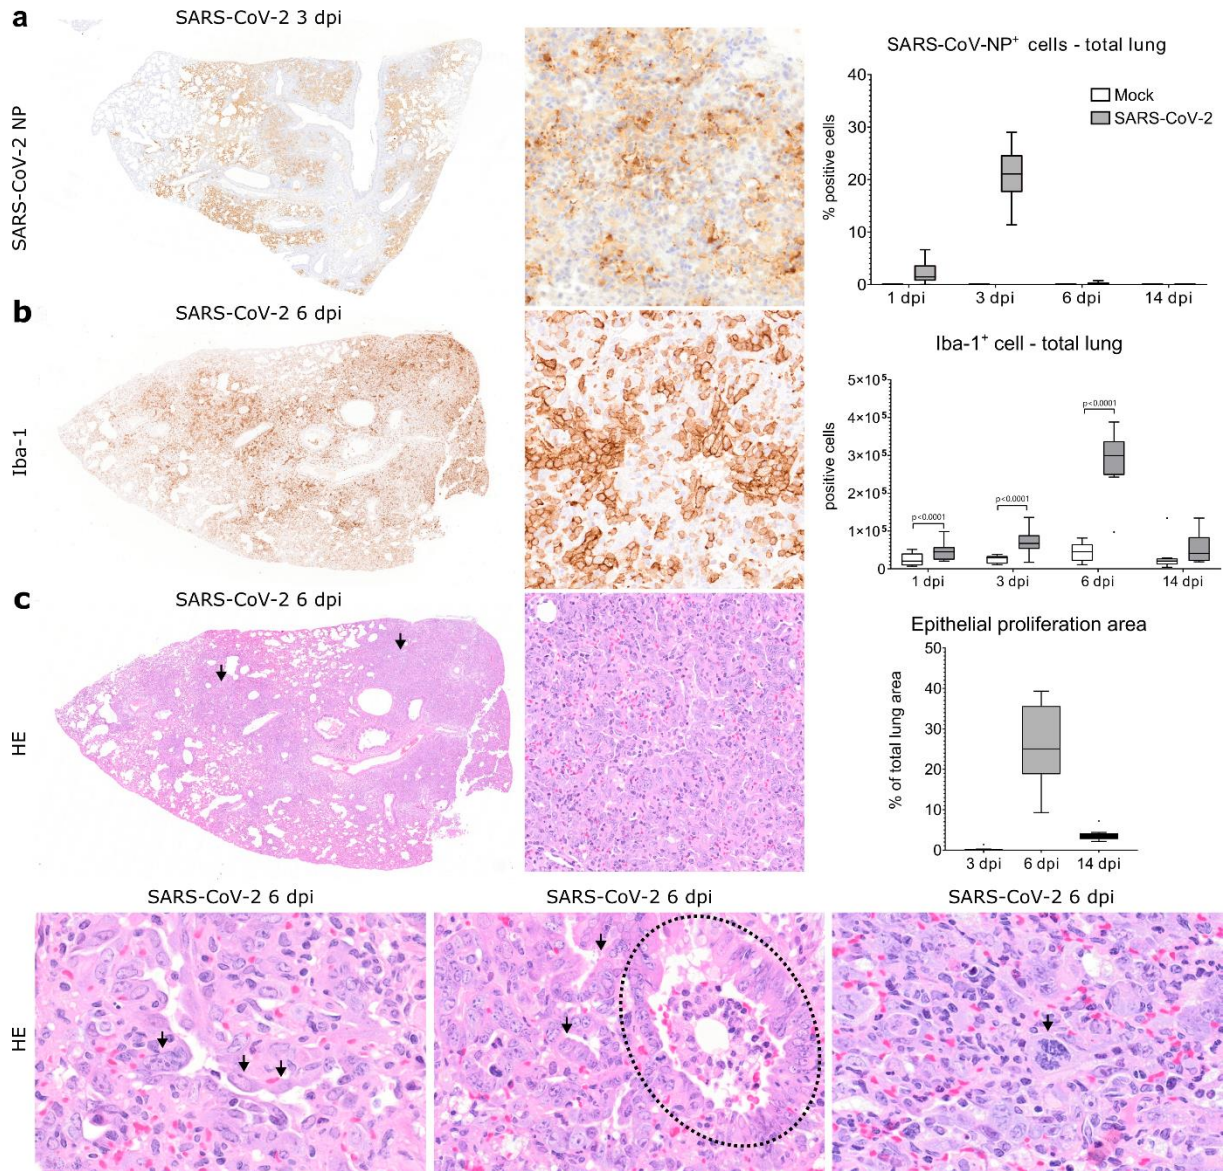

904

905

906 **Figure 2: Alveolar differentiation intermediate (ADI) cells in SARS-CoV-2 infected**  
907 **hamsters.**

908 **A** Schematic illustration of the trans-differentiation process from alveolar pneumocytes  
909 type 2 (AT2) to alveolar pneumocytes type 1 (AT1), as demonstrated below in the  
910 hamster. The AT2 to ADI cell trans-differentiation process is characterized by a  
911 decrease of pro surfactant protein-C (proSP-C) expression, increase of cytokeratin 8  
912 (CK8) expression as well as a morphologic transition from a round to polygonal to  
913 elongated shape (see D). The ultrastructural hallmark of the ADI to AT1 trans-  
914 differentiation is the presence of cells with an elongated AT1 morphology and AT2  
915 features, such as apical microvilli (see F). **B, C** Quantification of proSP-C<sup>+</sup> AT2 cells  
916 (B) and CK8<sup>+</sup> ADI cells (C) within total alveoli, non-affected alveoli, and affected alveoli  
917 as well as representative pictures of immunolabelling (brown signal, arrows) in the  
918 alveoli of mock and SARS-CoV-2 infected hamsters. **D** Representative double  
919 immunofluorescence image of an alveolar proliferation focus in a SARS-CoV-2  
920 infected hamster at 6 dpi. Cells are labelled with CK8 (green) and proSP-C (red). An  
921 overview and higher magnifications of the area delineated by a rectangle are shown.  
922 There are numerous proSP-C-CK8<sup>+</sup> ADI cells, some showing hypertrophy and  
923 elongated cytoplasmic processes (arrowheads) and single proSP-C<sup>+</sup>CK8<sup>+</sup> cells  
924 (asterisk) with a round morphology. **E** Representative double immunofluorescence of  
925 an alveolar proliferation focus in a SARS-CoV-2 infected hamster at 6 dpi. Cells are  
926 labelled with CK8 (green) and cell cycle exit marker p53 (red). The arrowheads shows  
927 polygonal, large, bizarre p53<sup>+</sup> ADI cells. **F** Representative transmission electron  
928 microscopy (TEM) micrograph showing alveoli of a SARS-CoV-2 infected hamster at  
929 6 dpi. A basement membrane separates AT1 cells from the endothelial cells lining  
930 capillary spaces (C) containing erythrocytes. A leukocyte (L) as well as an AT2 cell  
931 (AT2) with apical microvilli (arrow) and numerous intracytoplasmic multi-lamellar  
932 bodies (red asterisks) are also seen. Red boxes and high magnification show cells with  
933 flattened and elongated morphology of AT1 cells, with characteristics of AT2 cells, such  
934 as microvilli (arrows). Quantification data are shown as box and whisker plots.  
935 Statistical analysis was performed by two-tailed Mann-Whitney-U test. For multiple  
936 comparisons between time points, a Benjamini–Hochberg correction was applied. P-  
937 and q-values  $\leq 0.05$  were considered significant. N = 10 animals/group for mock and  
938 SARS-CoV-2 respectively. For quantifications, 1 longitudinal section containing all right  
939 lung lobes were evaluated. Source data will be provided as a source data file.

940

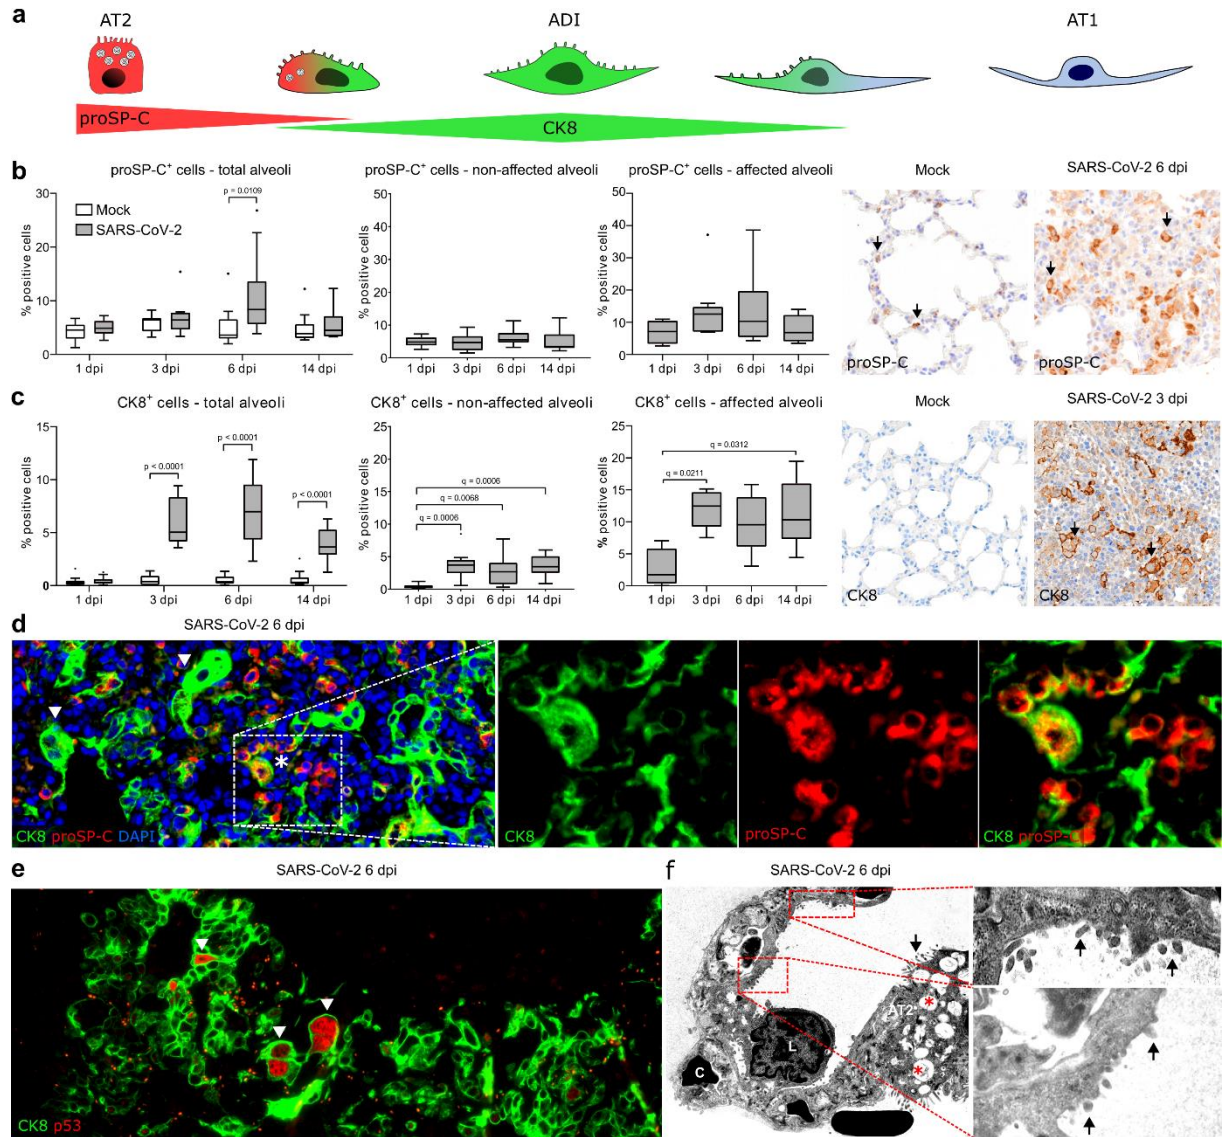

941

942

943 **Figure 3: Alveolar differentiation intermediate (ADI) cells in COVID-19 and non-**  
944 **COVID-19 pneumonia.**

945 **A** Representative images showing histopathological lesions in a COVID-19 patient  
946 (left) and in non-COVID-19 bronchopneumonia case (right). COVID-19 is  
947 characterized by diffuse alveolar damage (DAD) with hyaline membranes (arrows) and  
948 alveolar spaces filled with sloughed epithelial cells, leukocytes and edema (asterisks).  
949 Non-COVID-19 bronchopneumonia was characterized by intraluminal suppurative  
950 exudate (circle) and alveolar edema (arrowhead) without DAD. **B** Representative  
951 image of double immunofluorescence for the ADI marker CK8 (green) and the AT2  
952 marker proSP-C (red) in a COVID-19 (left) and non-COVID-19 bronchopneumonia  
953 (right) sample. Cells with a round morphology express both markers (arrows). **C**  
954 Representative image of double immunofluorescence for the ADI marker CK8 (green)  
955 and the cell cycle exit marker p53 (red) in a COVID-19 (left) and a non-COVID-19  
956 bronchopneumonia (right) sample. ADI cells in COVID-19 patients express p53 (arrow),  
957 while ADI cells in the non-COVID-19 bronchopneumonia case are negative.

958



959

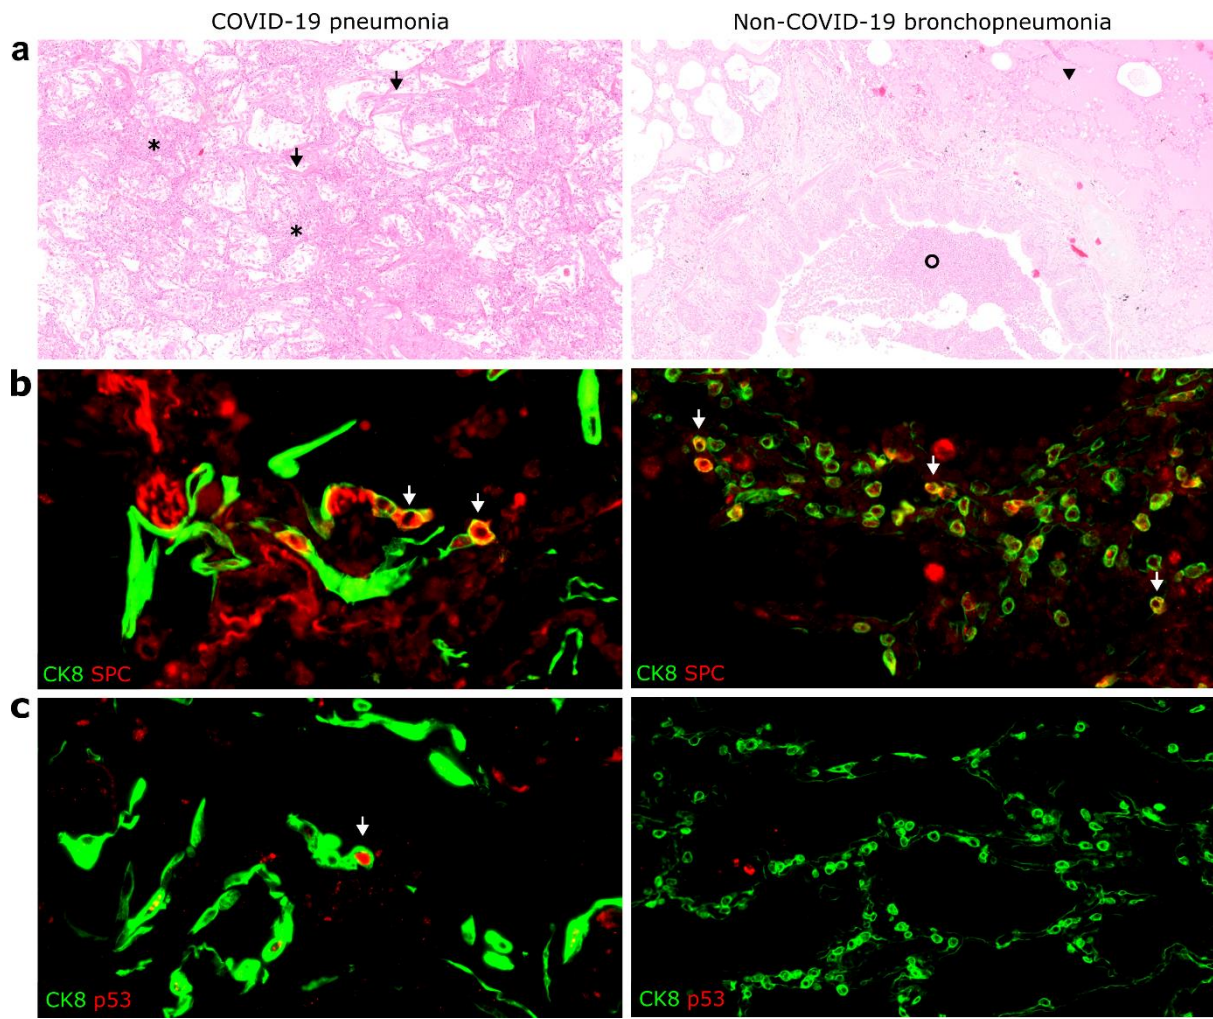

960

961

962 **Figure 4: Airway basal cells participate in alveolar regeneration in SARS-CoV-2**  
963 **infected hamsters.**

964 **A** Schematic illustration of the proposed trajectory of airway basal cells towards  
965 alveolar cells. CK14<sup>+</sup>CK5<sup>+</sup>ΔNP63<sup>+</sup> basal cells proliferate within the airways and give  
966 rise to different combinations of CK5<sup>+/-</sup>, CK14<sup>+/-</sup>, ΔNP63<sup>+/-</sup> progenitor cells (see also  
967 supplementary Fig. 5). Upon severe alveolar damage, rare ΔNP63<sup>+</sup>CK14<sup>+</sup> and frequent  
968 CK14<sup>+</sup> basal cells mobilize to the alveoli giving rise to alveolar pneumocytes type 2  
969 (AT2, see D) and/or to alveolar differentiation intermediate (ADI) cells (see E),  
970 particularly at 6 dpi. At 14 dpi, CK14<sup>+</sup> basal cells give rise to secretoglobin 1A1<sup>+</sup>  
971 (SCGB1A1) club cells within the peribronchiolar alveolar proliferates (see F). **B, C**  
972 Quantification of CK14<sup>+</sup> basal cells (B) and SCGB1A1<sup>+</sup> club cells (C) within  
973 intrapulmonary airways, total alveoli, non-affected alveoli, and affected alveoli as well  
974 as representative pictures of immunolabeled cells (brown signal) in the bronchioles  
975 and peribronchiolar proliferates in mock and SARS-CoV-2 infected hamsters at 6 and  
976 14 dpi. The percentage of the immunolabelled cells relative to total cells in the  
977 respective area is given. Pictures of SARS-CoV-2 infected hamsters at 6 and 14 dpi  
978 are taken from the same location for CK14 and SCGB1A1 immunolabelings. **D**  
979 Representative image of double immunofluorescence for CK14 (green) and proSP-C  
980 (red) in a peribronchiolar proliferation area in a SARS-CoV-2 infected hamster at 6 dpi.  
981 An overview and higher magnifications of the area delineated by a rectangle are  
982 shown. The arrowhead shows a proSP-C<sup>+</sup> AT2 cell. The arrows indicate double labeled  
983 airway progenitors differentiating into proSP-C<sup>+</sup> AT2 cells. **E** Representative image of  
984 double immunofluorescence for CK14 (red) and CK8 (green) in a peribronchiolar  
985 proliferation area in a SARS-CoV-2 infected hamster at 6 dpi. An overview and higher  
986 magnifications of the area delineated by a rectangle are shown. The image shows a  
987 transition from CK14<sup>+</sup> airway basal cells forming a pod (white arrowhead), to double  
988 labeled CK14<sup>+</sup>CK8<sup>+</sup> cells differentiating into elongated ADI cells (open arrowheads)  
989 and CK14<sup>-</sup>CK8<sup>+</sup>, elongated ADI cells (arrows). **F** Representative image of double  
990 immunofluorescence for CK14 (green) and SCGB1A1 (red) in a peribronchiolar  
991 proliferation area in a SARS-CoV-2 infected hamster at 14 dpi. An overview and higher  
992 magnifications of the area delineated by a rectangle are shown. A transition from  
993 CK14<sup>+</sup> airway basal cells (arrowhead) to CK14<sup>+</sup>SCGB1A1<sup>+</sup> club cells (arrows) is  
994 shown. Quantification data are shown as box and whisker plots. Statistical analysis  
995 was performed by two-tailed Mann-Whitney-U test. For multiple comparisons between  
996 time points, a Benjamini–Hochberg correction was applied. P- and q-values ≤0.05 were  
997 considered significant. N = 10 animals/group for mock and SARS-CoV-2 respectively.  
998 For quantifications, 1 longitudinal section containing all right lung lobes were  
999 evaluated. Source data will be provided as a source data file.

1000

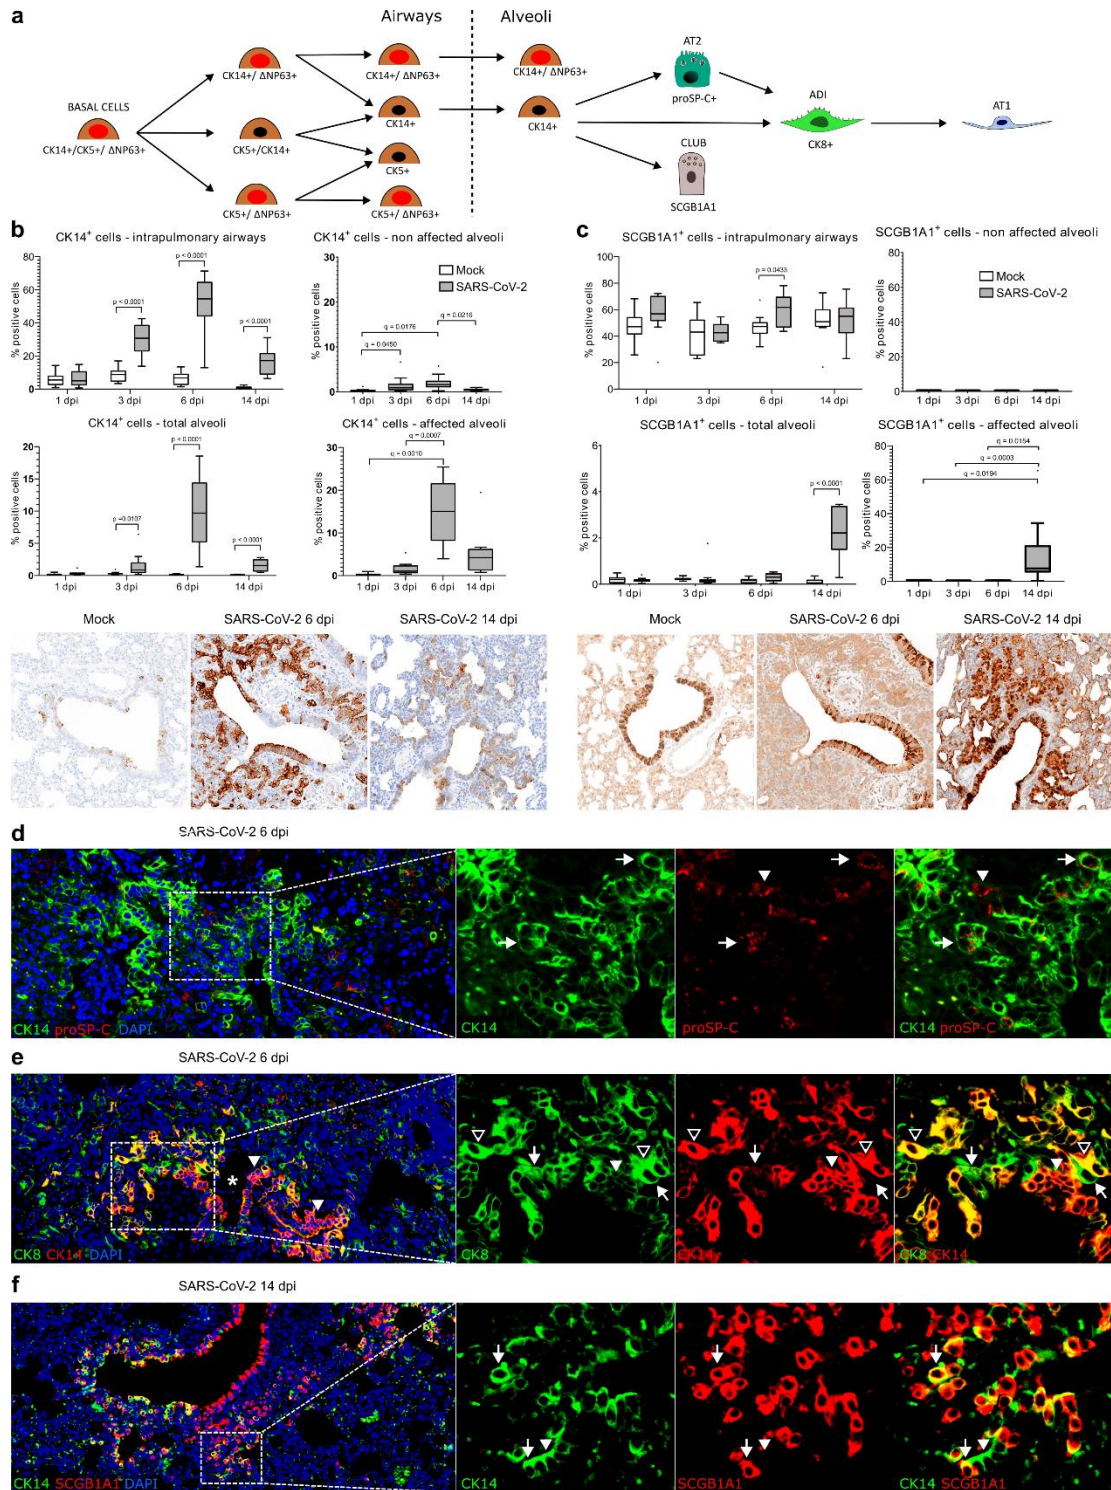

1001

1002

1003 **Figure 5: Sub-pleural fibrosis in SARS-CoV-2 infected hamsters.**

1004 **A-D** Representative images showing sub-pleural fibrotic foci in a lung lobe of a SARS-  
1005 CoV-2 infected hamster at 14 dpi. The left panel shows an overview of one right lung  
1006 lobe displaying multifocal, extensive, well demarcated areas of sub-pleural fibrosis.  
1007 The right panel shows at higher magnification of the area delineated by the rectangle.  
1008 On hematoxylin-eosin (HE) stained sections, this lesion is characterized by sub-pleural  
1009 aggregates of spindle cells and abundant, pale eosinophilic, fibrillary, extracellular  
1010 matrix (A). Azan stain demonstrates the presence of mature collagen fibers in the  
1011 matrix (blue signal, B). Immunohistochemistry shows abundant  $\alpha$ -smooth muscle actin  
1012 ( $\alpha$ -SMA)<sup>+</sup> myofibroblasts (brown signal in C) as well as infiltration with CD204<sup>+</sup> M2  
1013 macrophages (brown signal, D). **E** Quantification of sub-pleural fibrosis in lungs of  
1014 mock and SARS-CoV-2infected hamsters at 14 dpi. The percentage of affected area  
1015 relative to total lung area is given. **F** Quantification of CD204<sup>+</sup> M2 macrophages in total  
1016 lung area. Data are shown as box and whisker plots. Data from CD204 quantification  
1017 was tested by two-tailed Mann-Whitney-U test. A p-value of  $\leq 0.05$  was chosen as the  
1018 cut-off for statistical significance. N = 10 animals/group for mock and SARS-CoV-2  
1019 respectively. For quantifications, 1 longitudinal section containing all right lung lobes  
1020 were evaluated. Source data will be provided as a source data file.

1021

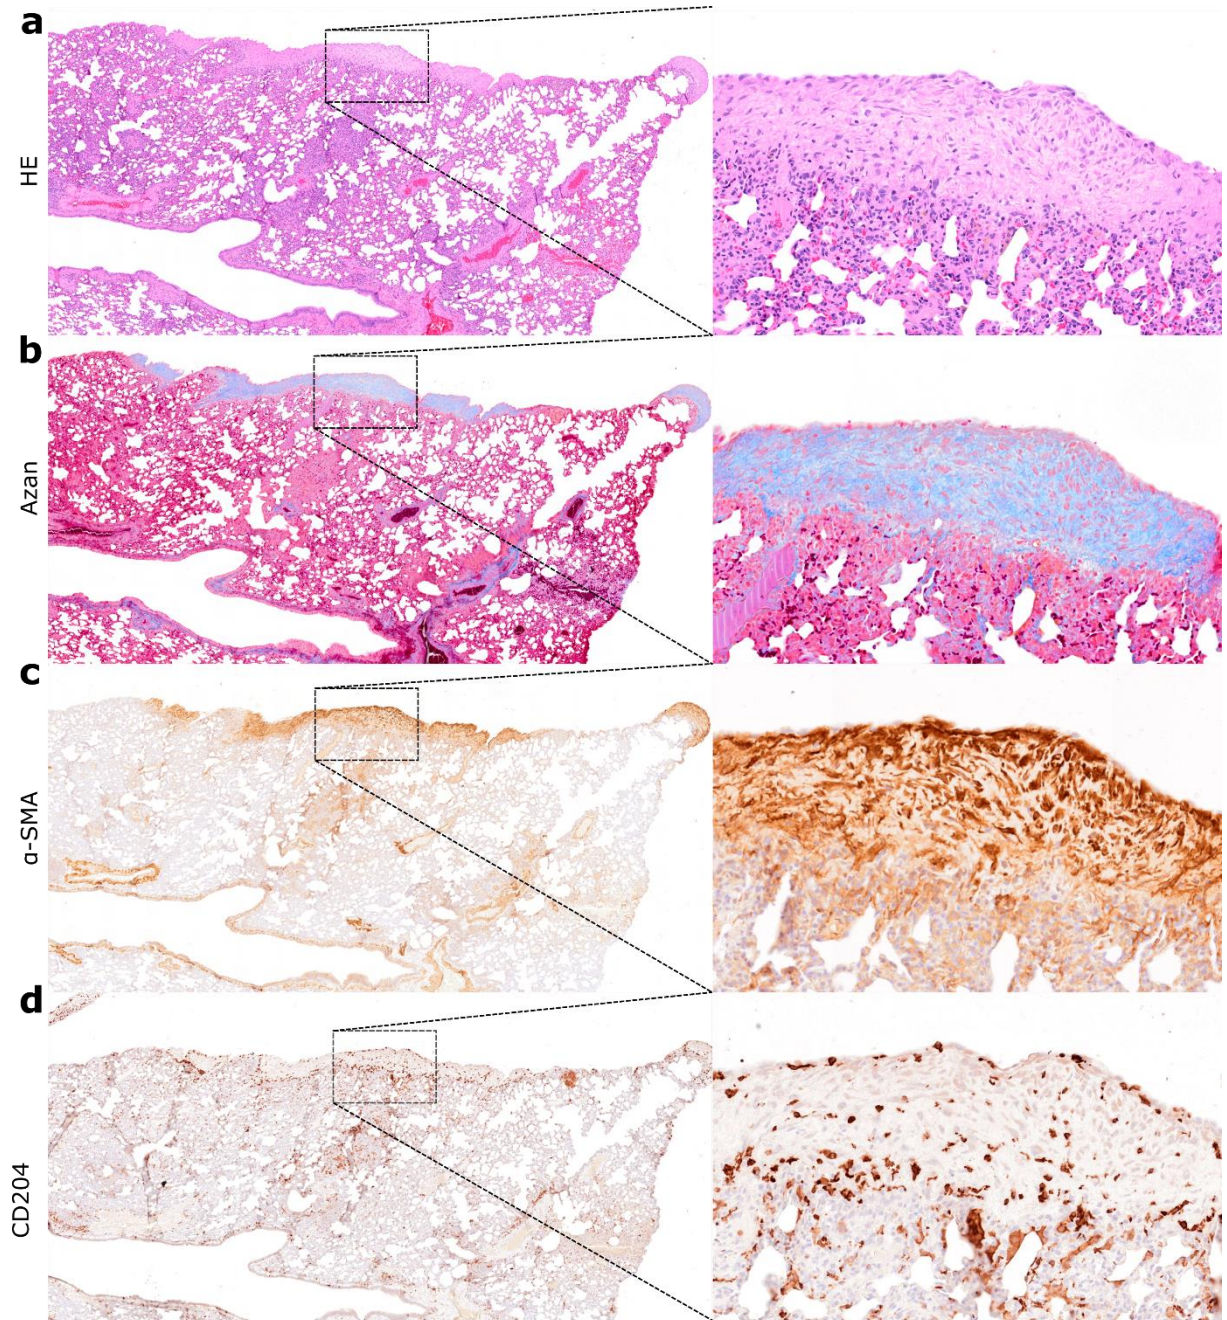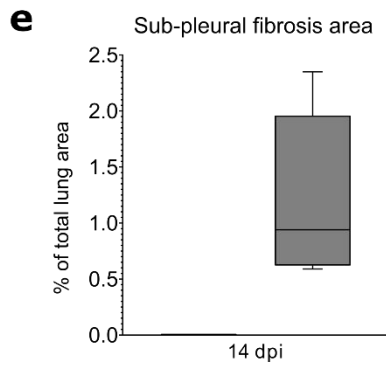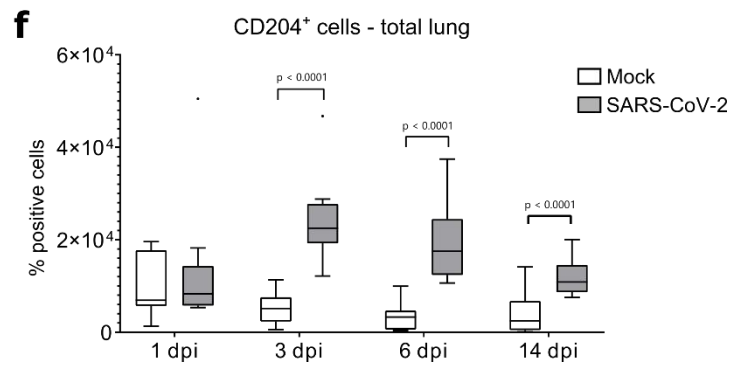

1022

1023

1024

1025 **Figure 6: Single cell analysis of alveolar cells in SARS-CoV-2 infected hamsters.**  
1026 Single cell RNA-Seq data set (GSE162208) from lungs of SARS-CoV-2 infected  
1027 hamsters killed at 5 (A-F) or 14 (G-L) days post infection (dpi). **A, G** Expression of AT1  
1028 (green *Rtkn2*) and AT2 (orange *Lamp3*) marker genes. **B-F** and **H-L** Results from  
1029 module score analysis for cell marker genes. For cell marker gene list, see  
1030 supplementary table 1.

1031

1032

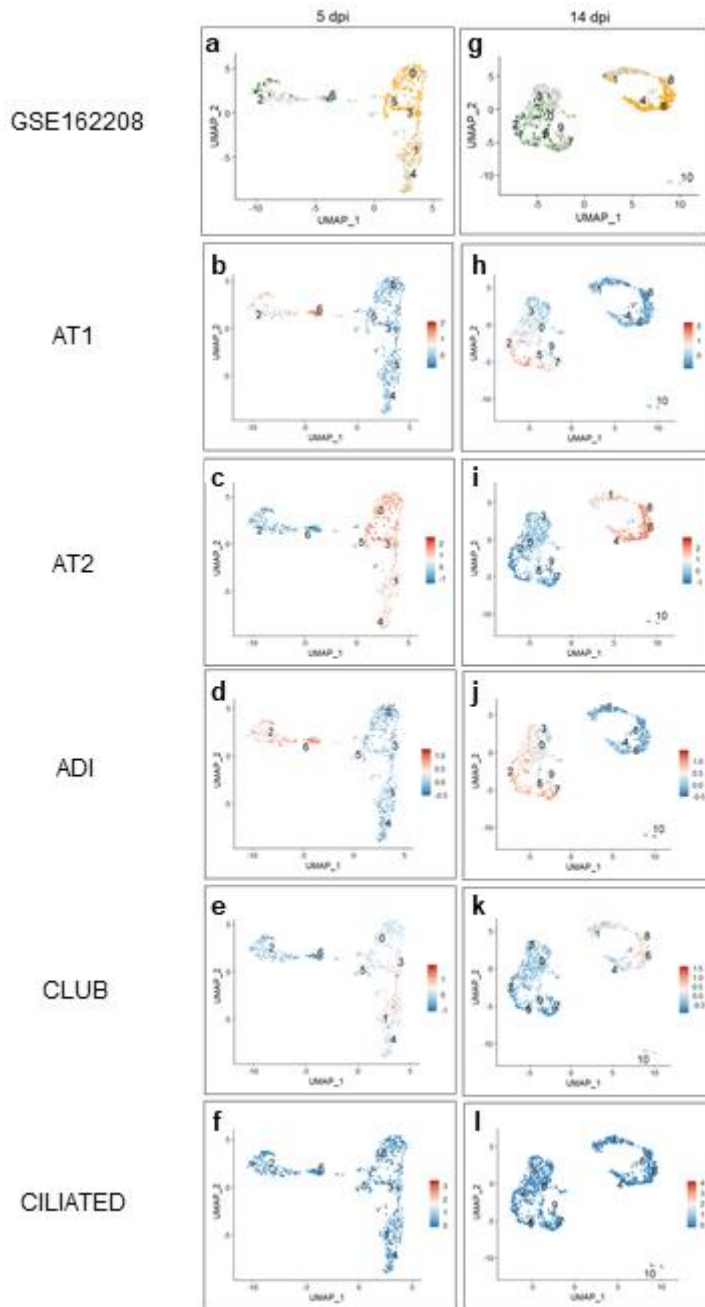

1033

1034

1035 **Figure 7: Module scores for GSEA hallmark genes within alveolar cells in SARS-**  
1036 **CoV-2 infected hamsters. A-N** Results from module score analysis for GSEA  
1037 hallmark genes. The cluster names are indicated.

1038



1039

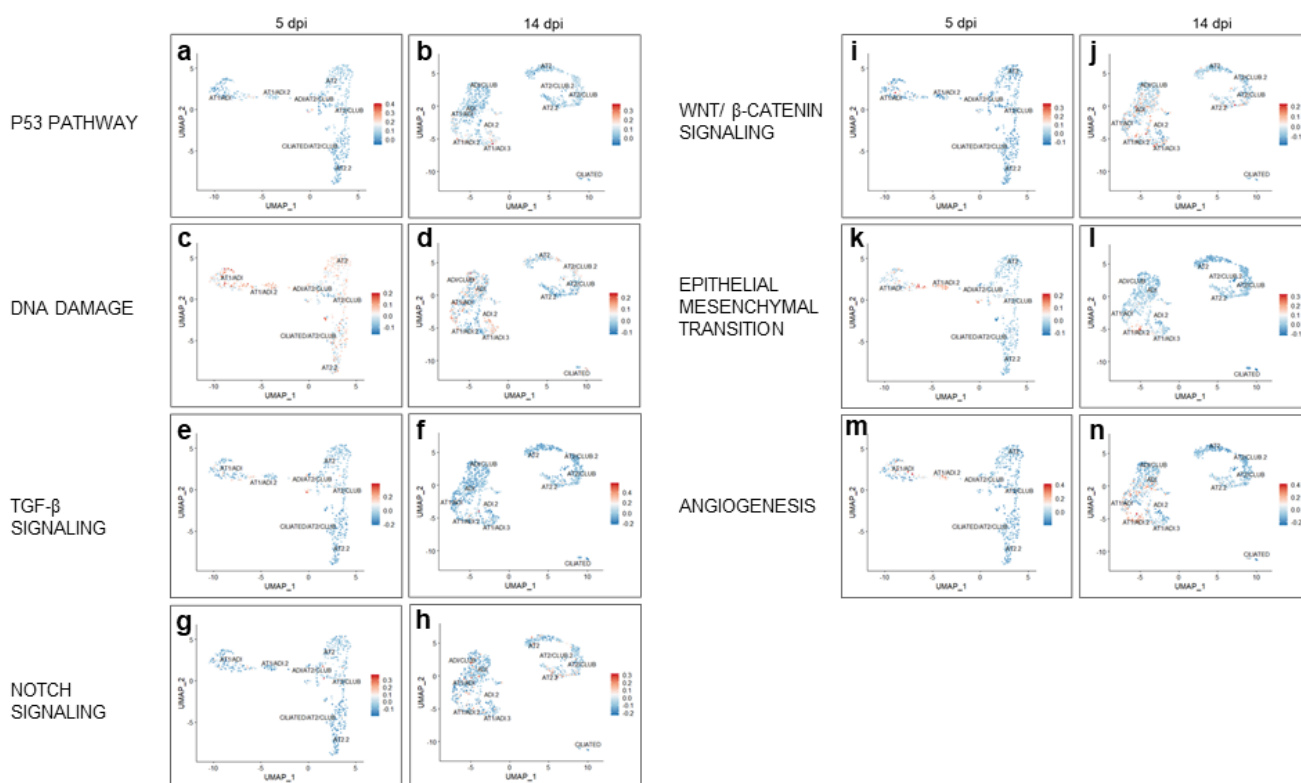

1040

1041

1042

## 1043 REFERENCES

- 1044 1 WHO. *A clinical case definition of post COVID-19 condition by a Delphi consensus, 6 October*  
1045 *2021*, <[https://www.who.int/publications/i/item/WHO-2019-nCoV-Post\\_COVID-](https://www.who.int/publications/i/item/WHO-2019-nCoV-Post_COVID-19_condition-Clinical_case_definition-2021.1)  
1046 [19\\_condition-Clinical\\_case\\_definition-2021.1](https://www.who.int/publications/i/item/WHO-2019-nCoV-Post_COVID-19_condition-Clinical_case_definition-2021.1)> (2021).
- 1047 2 Nalbandian, A. *et al.* Post-acute COVID-19 syndrome. *Nat. Med.* **27**, 601-615 (2021).  
1048 <https://doi.org/10.1038/s41591-021-01283-z>
- 1049 3 Castanares-Zapatero, D. *et al.* Pathophysiology and mechanism of long COVID: a  
1050 comprehensive review. *Ann Med* **54**, 1473-1487 (2022).  
1051 <https://doi.org/10.1080/07853890.2022.2076901>
- 1052 4 Sudre, C. H. *et al.* Attributes and predictors of long COVID. *Nat. Med.* **27**, 626-631 (2021).  
1053 <https://doi.org/10.1038/s41591-021-01292-y>
- 1054 5 Ayoubkhani, D. P. & Gaughan, C. *Technical article: Updated estimates of the prevalence of*  
1055 *post-acute symptoms among people with coronavirus (COVID-19) in the UK: 26 April 2020 to*  
1056 *1 August 2021.*,  
1057 <[https://www.ons.gov.uk/peoplepopulationandcommunity/healthandsocialcare/conditionsa](https://www.ons.gov.uk/peoplepopulationandcommunity/healthandsocialcare/conditionsanddiseases/articles/technicalarticleupdatedestimatesoftheprevalenceofpostacutesymptomsamongpeoplewithcoronaviruscovid19intheuk/26april2020to1august2021)  
1058 [nddiseases/articles/technicalarticleupdatedestimatesoftheprevalenceofpostacutesymptoms](https://www.ons.gov.uk/peoplepopulationandcommunity/healthandsocialcare/conditionsanddiseases/articles/technicalarticleupdatedestimatesoftheprevalenceofpostacutesymptomsamongpeoplewithcoronaviruscovid19intheuk/26april2020to1august2021)  
1059 [amongpeoplewithcoronaviruscovid19intheuk/26april2020to1august2021](https://www.ons.gov.uk/peoplepopulationandcommunity/healthandsocialcare/conditionsanddiseases/articles/technicalarticleupdatedestimatesoftheprevalenceofpostacutesymptomsamongpeoplewithcoronaviruscovid19intheuk/26april2020to1august2021)> (2021).
- 1060 6 Staudt, A. *et al.* Associations of Post-Acute COVID syndrome with physiological and clinical  
1061 measures 10 months after hospitalization in patients of the first wave. *Eur J Intern Med* **95**,  
1062 50-60 (2022). <https://doi.org/10.1016/j.ejim.2021.10.031>
- 1063 7 Fernández-de-Las-Peñas, C., Martín-Guerrero, J. D., Cancela-Cilleruelo, I., Moro-López-  
1064 Menchero, P. & Pellicer-Valero, O. J. Exploring the recovery curve for long-term post-COVID  
1065 dyspnea and fatigue. *Eur J Intern Med* **101**, 120-123 (2022).  
1066 <https://doi.org/10.1016/j.ejim.2022.03.036>
- 1067 8 Ting, C. *et al.* Fatal COVID-19 and Non-COVID-19 Acute Respiratory Distress Syndrome Is  
1068 Associated with Incomplete Alveolar Type 1 Epithelial Cell Differentiation from the  
1069 Transitional State without Fibrosis. *Am. J. Pathol.* **192**, 454-467 (2022).  
1070 <https://doi.org/10.1016/j.ajpath.2021.11.014>
- 1071 9 Melms, J. C. *et al.* A molecular single-cell lung atlas of lethal COVID-19. *Nature* **595**, 114-119  
1072 (2021). <https://doi.org/10.1038/s41586-021-03569-1>
- 1073 10 Parimon, T. *et al.* Potential Mechanisms for Lung Fibrosis Associated with COVID-19 Infection.  
1074 *QJM* (2022). <https://doi.org/10.1093/qjmed/hcac206>
- 1075 11 Carsana, L. *et al.* Pulmonary post-mortem findings in a series of COVID-19 cases from  
1076 northern Italy: a two-centre descriptive study. *The Lancet Infectious Diseases* **20**, 1135-1140  
1077 (2020). [https://doi.org/10.1016/s1473-3099\(20\)30434-5](https://doi.org/10.1016/s1473-3099(20)30434-5)
- 1078 12 Polak, S. B., Van Gool, I. C., Cohen, D., von der Thusen, J. H. & van Paassen, J. A systematic  
1079 review of pathological findings in COVID-19: a pathophysiological timeline and possible  
1080 mechanisms of disease progression. *Mod. Pathol.* **33**, 2128-2138 (2020).  
1081 <https://doi.org/10.1038/s41379-020-0603-3>
- 1082 13 Liu, Q. *et al.* Lung regeneration by multipotent stem cells residing at the bronchioalveolar-  
1083 duct junction. *Nat Genet* **51**, 728-738 (2019). <https://doi.org/10.1038/s41588-019-0346-6>
- 1084 14 Liu, K. *et al.* Bi-directional differentiation of single bronchioalveolar stem cells during lung  
1085 repair. *Cell Discov* **6**, 1 (2020). <https://doi.org/10.1038/s41421-019-0132-8>
- 1086 15 Kathiriya, J. J., Brumwell, A. N., Jackson, J. R., Tang, X. & Chapman, H. A. Distinct Airway  
1087 Epithelial Stem Cells Hide among Club Cells but Mobilize to Promote Alveolar Regeneration.  
1088 *Cell Stem Cell* **26**, 346-358 e344 (2020). <https://doi.org/10.1016/j.stem.2019.12.014>
- 1089 16 Barkauskas, C. E. A Specialized Few Among Many: Identification of a Novel Lung Epithelial  
1090 Stem Cell Population. *Cell Stem Cell* **26**, 295-296 (2020).  
1091 <https://doi.org/10.1016/j.stem.2020.02.010>
- 1092 17 Vaughan, A. E. *et al.* Lineage-negative progenitors mobilize to regenerate lung epithelium  
1093 after major injury. *Nature* **517**, 621-625 (2015). <https://doi.org/10.1038/nature14112>

- 1094 18 Jiang, P. *et al.* Ineffectual Type 2-to-Type 1 Alveolar Epithelial Cell Differentiation in  
1095 Idiopathic Pulmonary Fibrosis: Persistence of the KRT8(hi) Transitional State. *Am J Respir Crit*  
1096 *Care Med* **201**, 1443-1447 (2020). <https://doi.org/10.1164/rccm.201909-1726LE>
- 1097 19 Strunz, M. *et al.* Alveolar regeneration through a Krt8+ transitional stem cell state that  
1098 persists in human lung fibrosis. *Nat Commun* **11**, 3559 (2020).  
1099 <https://doi.org/10.1038/s41467-020-17358-3>
- 1100 20 Riemondy, K. A. *et al.* Single cell RNA sequencing identifies TGF $\beta$  as a key regenerative cue  
1101 following LPS-induced lung injury. *JCI Insight* **5** (2019).  
1102 <https://doi.org/10.1172/jci.insight.123637>
- 1103 21 Kobayashi, Y. *et al.* Persistence of a regeneration-associated, transitional alveolar epithelial  
1104 cell state in pulmonary fibrosis. *Nat. Cell Biol.* **22**, 934-946 (2020).  
1105 <https://doi.org/10.1038/s41556-020-0542-8>
- 1106 22 Jansing, N. L. *et al.* Unbiased Quantitation of Alveolar Type II to Alveolar Type I Cell  
1107 Transdifferentiation during Repair after Lung Injury in Mice. *Am J Respir Cell Mol Biol* **57**, 519-  
1108 526 (2017). <https://doi.org/10.1165/rcmb.2017-0037MA>
- 1109 23 Wu, H. *et al.* Progressive Pulmonary Fibrosis Is Caused by Elevated Mechanical Tension on  
1110 Alveolar Stem Cells. *Cell* **180**, 107-121.e117 (2020).  
1111 <https://doi.org/10.1016/j.cell.2019.11.027>
- 1112 24 Delorey, T. M. *et al.* COVID-19 tissue atlases reveal SARS-CoV-2 pathology and cellular  
1113 targets. *Nature* (2021). <https://doi.org/10.1038/s41586-021-03570-8>
- 1114 25 Bharat, A. *et al.* Lung transplantation for patients with severe COVID-19. *Sci Transl Med* **12**  
1115 (2020). <https://doi.org/10.1126/scitranslmed.abe4282>
- 1116 26 Chan, J. F. *et al.* Simulation of the Clinical and Pathological Manifestations of Coronavirus  
1117 Disease 2019 (COVID-19) in a Golden Syrian Hamster Model: Implications for Disease  
1118 Pathogenesis and Transmissibility. *Clin. Infect. Dis.* **71**, 2428-2446 (2020).  
1119 <https://doi.org/10.1093/cid/ciaa325>
- 1120 27 Sia, S. F. *et al.* Pathogenesis and transmission of SARS-CoV-2 in golden hamsters. *Nature* **583**,  
1121 834-838 (2020). <https://doi.org/10.1038/s41586-020-2342-5>
- 1122 28 Muñoz-Fontela, C. *et al.* Animal models for COVID-19. *Nature* **586**, 509-515 (2020).  
1123 <https://doi.org/10.1038/s41586-020-2787-6>
- 1124 29 Ciurkiewicz, M. *et al.* Ferrets are valuable models for SARS-CoV-2 research. *Vet Pathol* **59**,  
1125 661-672 (2022). <https://doi.org/10.1177/03009858211071012>
- 1126 30 Winkler, E. S. *et al.* SARS-CoV-2 infection of human ACE2-transgenic mice causes severe lung  
1127 inflammation and impaired function. *Nat Immunol* **21**, 1327-1335 (2020).  
1128 <https://doi.org/10.1038/s41590-020-0778-2>
- 1129 31 Mulka, K. R. *et al.* Progression and Resolution of Severe Acute Respiratory Syndrome  
1130 Coronavirus 2 (SARS-CoV-2) Infection in Golden Syrian Hamsters. *Am J Pathol* **192**, 195-207  
1131 (2022). <https://doi.org/10.1016/j.ajpath.2021.10.009>
- 1132 32 Frere, J. J. *et al.* SARS-CoV-2 infection in hamsters and humans results in lasting and unique  
1133 systemic perturbations post recovery. *Sci. Transl. Med.* (2022).  
1134 <https://doi.org/10.1126/scitranslmed.abq3059>
- 1135 33 Becker, K. *et al.* Vasculitis and Neutrophil Extracellular Traps in Lungs of Golden Syrian  
1136 Hamsters With SARS-CoV-2. *Front. Immunol.* **12**, 640842 (2021).  
1137 <https://doi.org/10.3389/fimmu.2021.640842>
- 1138 34 Allnoch, L. *et al.* Vascular Inflammation Is Associated with Loss of Aquaporin 1 Expression on  
1139 Endothelial Cells and Increased Fluid Leakage in SARS-CoV-2 Infected Golden Syrian  
1140 Hamsters. *Viruses* **13** (2021). <https://doi.org/10.3390/v13040639>
- 1141 35 Armando, F. *et al.* SARS-CoV-2 Omicron variant causes mild pathology in the upper and lower  
1142 respiratory tract of hamsters. *Nat Commun* **13**, 3519 (2022). <https://doi.org/10.1038/s41467-022-31200-y>
- 1143  
1144 36 Chen, J., Wu, H., Yu, Y. & Tang, N. Pulmonary alveolar regeneration in adult COVID-19  
1145 patients. *Cell Res.* **30**, 708-710 (2020). <https://doi.org/10.1038/s41422-020-0369-7>

- 1146 37 Zuo, W. *et al.* p63(+)Krt5(+) distal airway stem cells are essential for lung regeneration. *Nature* **517**, 616-620 (2015). <https://doi.org/10.1038/nature13903>
- 1147
- 1148 38 Zacharias, W. J. *et al.* Regeneration of the lung alveolus by an evolutionarily conserved  
1149 epithelial progenitor. *Nature* **555**, 251-255 (2018). <https://doi.org/10.1038/nature25786>
- 1150 39 Parekh, K. R. *et al.* Stem cells and lung regeneration. *Am. J. Physiol. Cell Physiol.* **319**, C675-  
1151 C693 (2020). <https://doi.org/10.1152/ajpcell.00036.2020>
- 1152 40 Smirnova, N. F. *et al.* Detection and quantification of epithelial progenitor cell populations in  
1153 human healthy and IPF lungs. *Respir. Res.* **17**, 83 (2016). <https://doi.org/10.1186/s12931-016-0404-x>
- 1154
- 1155 41 Musah, S., Chen, J. & Hoyle, G. W. Repair of tracheal epithelium by basal cells after chlorine-  
1156 induced injury. *Respir. Res.* **13**, 107 (2012). <https://doi.org/10.1186/1465-9921-13-107>
- 1157 42 Dinnon, K. H., 3rd *et al.* SARS-CoV-2 infection produces chronic pulmonary epithelial and  
1158 immune cell dysfunction with fibrosis in mice. *Sci. Transl. Med.* **14**, eabo5070 (2022).  
1159 <https://doi.org/10.1126/scitranslmed.abo5070>
- 1160 43 Nouailles, G. *et al.* Temporal omics analysis in Syrian hamsters unravel cellular effector  
1161 responses to moderate COVID-19. *Nat Commun* **12**, 4869 (2021).  
1162 <https://doi.org/10.1038/s41467-021-25030-7>
- 1163 44 Xie, T. *et al.* Abnormal respiratory progenitors in fibrotic lung injury. *Stem Cell. Res. Ther.* **13**,  
1164 64 (2022). <https://doi.org/10.1186/s13287-022-02737-y>
- 1165 45 Carvallo, F. R. & Stevenson, V. B. Interstitial pneumonia and diffuse alveolar damage in  
1166 domestic animals. *Vet. Pathol.* **59**, 586-601 (2022).  
1167 <https://doi.org/10.1177/03009858221082228>
- 1168 46 Guler, S. A. *et al.* Pulmonary function and radiological features 4 months after COVID-19: first  
1169 results from the national prospective observational Swiss COVID-19 lung study. *Eur. Respir. J.*  
1170 **57** (2021). <https://doi.org/10.1183/13993003.03690-2020>
- 1171 47 Desai, A. D., Lavelle, M., Boursiquot, B. C. & Wan, E. Y. Long-term complications of COVID-19.  
1172 *Am. J. Physiol. Cell Physiol.* **322**, C1-c11 (2022). <https://doi.org/10.1152/ajpcell.00375.2021>
- 1173 48 Singh, I. & Joseph, P. Short and Long Term Non-Invasive Cardiopulmonary Exercise  
1174 Assessment in previously Hospitalized COVID-19 Patients. *Eur. Respir. J.* (2022).  
1175 <https://doi.org/10.1183/13993003.01739-2022>
- 1176 49 Kreye, J. *et al.* A Therapeutic Non-self-reactive SARS-CoV-2 Antibody Protects from Lung  
1177 Pathology in a COVID-19 Hamster Model. *Cell* **183**, 1058-1069 e1019 (2020).  
1178 <https://doi.org/10.1016/j.cell.2020.09.049>
- 1179 50 Baptiste, N. & Prives, C. p53 in the cytoplasm: a question of overkill? *Cell* **116**, 487-489  
1180 (2004). [https://doi.org/10.1016/s0092-8674\(04\)00164-3](https://doi.org/10.1016/s0092-8674(04)00164-3)
- 1181 51 McGregor, A. L., Hsia, C. R. & Lammerding, J. Squish and squeeze-the nucleus as a physical  
1182 barrier during migration in confined environments. *Curr. Opin. Cell Biol.* **40**, 32-40 (2016).  
1183 <https://doi.org/10.1016/j.ceb.2016.01.011>
- 1184 52 Yao, C. *et al.* Senescence of Alveolar Type 2 Cells Drives Progressive Pulmonary Fibrosis. *Am.*  
1185 *J. Respir. Crit. Care Med.* **203**, 707-717 (2021). <https://doi.org/10.1164/rccm.202004-1274OC>
- 1186 53 Lehmann, M. *et al.* Chronic WNT/ $\beta$ -catenin signaling induces cellular senescence in lung  
1187 epithelial cells. *Cell. Signal.* **70**, 109588 (2020). <https://doi.org/10.1016/j.cellsig.2020.109588>
- 1188 54 Finn, J. *et al.* Dlk1-Mediated Temporal Regulation of Notch Signaling Is Required for  
1189 Differentiation of Alveolar Type II to Type I Cells during Repair. *Cell Rep.* **26**, 2942-2954.e2945  
1190 (2019). <https://doi.org/10.1016/j.celrep.2019.02.046>
- 1191 55 Lee, S. *et al.* Virus-induced senescence is a driver and therapeutic target in COVID-19. *Nature*  
1192 **599**, 283-289 (2021). <https://doi.org/10.1038/s41586-021-03995-1>
- 1193 56 Rosenke, K. *et al.* Defining the Syrian hamster as a highly susceptible preclinical model for  
1194 SARS-CoV-2 infection. *Emerg Microbes Infect* **9**, 2673-2684 (2020).  
1195 <https://doi.org/10.1080/22221751.2020.1858177>

- 1196 57 Song, Z. *et al.* SARS-CoV-2 Causes a Systemically Multiple Organs Damages and Dissemination  
1197 in Hamsters. *Front. Microbiol.* **11**, 618891 (2020).  
1198 <https://doi.org/10.3389/fmicb.2020.618891>
- 1199 58 Hinz, B. Mechanical aspects of lung fibrosis: a spotlight on the myofibroblast. *Proc. Am.*  
1200 *Thorac. Soc.* **9**, 137-147 (2012). <https://doi.org/10.1513/pats.201202-017AW>
- 1201 59 Braga, T. T., Agudelo, J. S. & Camara, N. O. Macrophages During the Fibrotic Process: M2 as  
1202 Friend and Foe. *Front. Immunol.* **6**, 602 (2015). <https://doi.org/10.3389/fimmu.2015.00602>
- 1203 60 Hill, C., Jones, M. G., Davies, D. E. & Wang, Y. Epithelial-mesenchymal transition contributes  
1204 to pulmonary fibrosis via aberrant epithelial/fibroblastic cross-talk. *J Lung Health Dis* **3**, 31-35  
1205 (2019).
- 1206 61 Yao, L. *et al.* Paracrine signalling during ZEB1-mediated epithelial-mesenchymal transition  
1207 augments local myofibroblast differentiation in lung fibrosis. *Cell Death Differ.* **26**, 943-957  
1208 (2019). <https://doi.org/10.1038/s41418-018-0175-7>
- 1209 62 Ackermann, M. *et al.* The fatal trajectory of pulmonary COVID-19 is driven by lobular  
1210 ischemia and fibrotic remodelling. *EBioMedicine* **85**, 104296 (2022).  
1211 <https://doi.org/10.1016/j.ebiom.2022.104296>
- 1212 63 Zhao, Z. *et al.* Single-cell analysis identified lung progenitor cells in COVID-19 patients. *Cell*  
1213 *Prolif.* **53**, e12931 (2020). <https://doi.org/10.1111/cpr.12931>
- 1214 64 Schreiner, T. *et al.* SARS-CoV-2 Infection Dysregulates Cilia and Basal Cell Homeostasis in the  
1215 Respiratory Epithelium of Hamsters. *Int. J. Mol. Sci.* **23** (2022).  
1216 <https://doi.org/10.3390/ijms23095124>
- 1217 65 Armando, F. *et al.* Intratumoral Canine Distemper Virus Infection Inhibits Tumor Growth by  
1218 Modulation of the Tumor Microenvironment in a Murine Xenograft Model of Canine  
1219 Histiocytic Sarcoma. *Int. J. Mol. Sci.* **22** (2021). <https://doi.org/10.3390/ijms22073578>
- 1220 66 Armando, F. *et al.* Mesenchymal to epithelial transition driven by canine distemper virus  
1221 infection of canine histiocytic sarcoma cells contributes to a reduced cell motility in vitro. *J.*  
1222 *Cell. Mol. Med.* **24**, 9332-9348 (2020). <https://doi.org/10.1111/jcmm.15585>
- 1223 67 Armando, F. *et al.* Endocanalicular transendothelial crossing (ETC): A novel intravasation  
1224 mode used by HEK-EBNA293-VEGF-D cells during the metastatic process in a xenograft  
1225 model. *PLoS One* **15**, e0239932 (2020). <https://doi.org/10.1371/journal.pone.0239932>
- 1226 68 Bankhead, P. *et al.* QuPath: Open source software for digital pathology image analysis. *Sci.*  
1227 *Rep.* **7**, 16878 (2017). <https://doi.org/10.1038/s41598-017-17204-5>
- 1228 69 R\_Core\_Team. R: A language and environment for statistical computing. *R Foundation for*  
1229 *Statistical Computing, Vienna, Austria* URL <http://www.R-project.org/> (2014).
- 1230 70 Satija, R., Farrell, J. A., Gennert, D., Schier, A. F. & Regev, A. Spatial reconstruction of single-  
1231 cell gene expression data. *Nat. Biotechnol.* **33**, 495-502 (2015).  
1232 <https://doi.org/10.1038/nbt.3192>
- 1233 71 Butler, A., Hoffman, P., Smibert, P., Papalexi, E. & Satija, R. Integrating single-cell  
1234 transcriptomic data across different conditions, technologies, and species. *Nat. Biotechnol.*  
1235 **36**, 411-420 (2018). <https://doi.org/10.1038/nbt.4096>
- 1236 72 Stuart, T. *et al.* Comprehensive Integration of Single-Cell Data. *Cell* **177**, 1888-1902.e1821  
1237 (2019). <https://doi.org/10.1016/j.cell.2019.05.031>
- 1238 73 Hao, Y. *et al.* Integrated analysis of multimodal single-cell data. *Cell* **184**, 3573-3587.e3529  
1239 (2021). <https://doi.org/10.1016/j.cell.2021.04.048>
- 1240 74 Liberzon, A. *et al.* The Molecular Signatures Database (MSigDB) hallmark gene set collection.  
1241 *Cell Syst* **1**, 417-425 (2015). <https://doi.org/10.1016/j.cels.2015.12.004>

1242
